# Supplementary material for: Estimating the impact of Tiny Targets in reducing the incidence of Gambian sleeping sickness in the North-west Uganda focus
Source: PubMed Central journal article supplement (PMC8371857; doi:10.1186/s13071-021-04889-x), 2021-08-18

Fig. S1

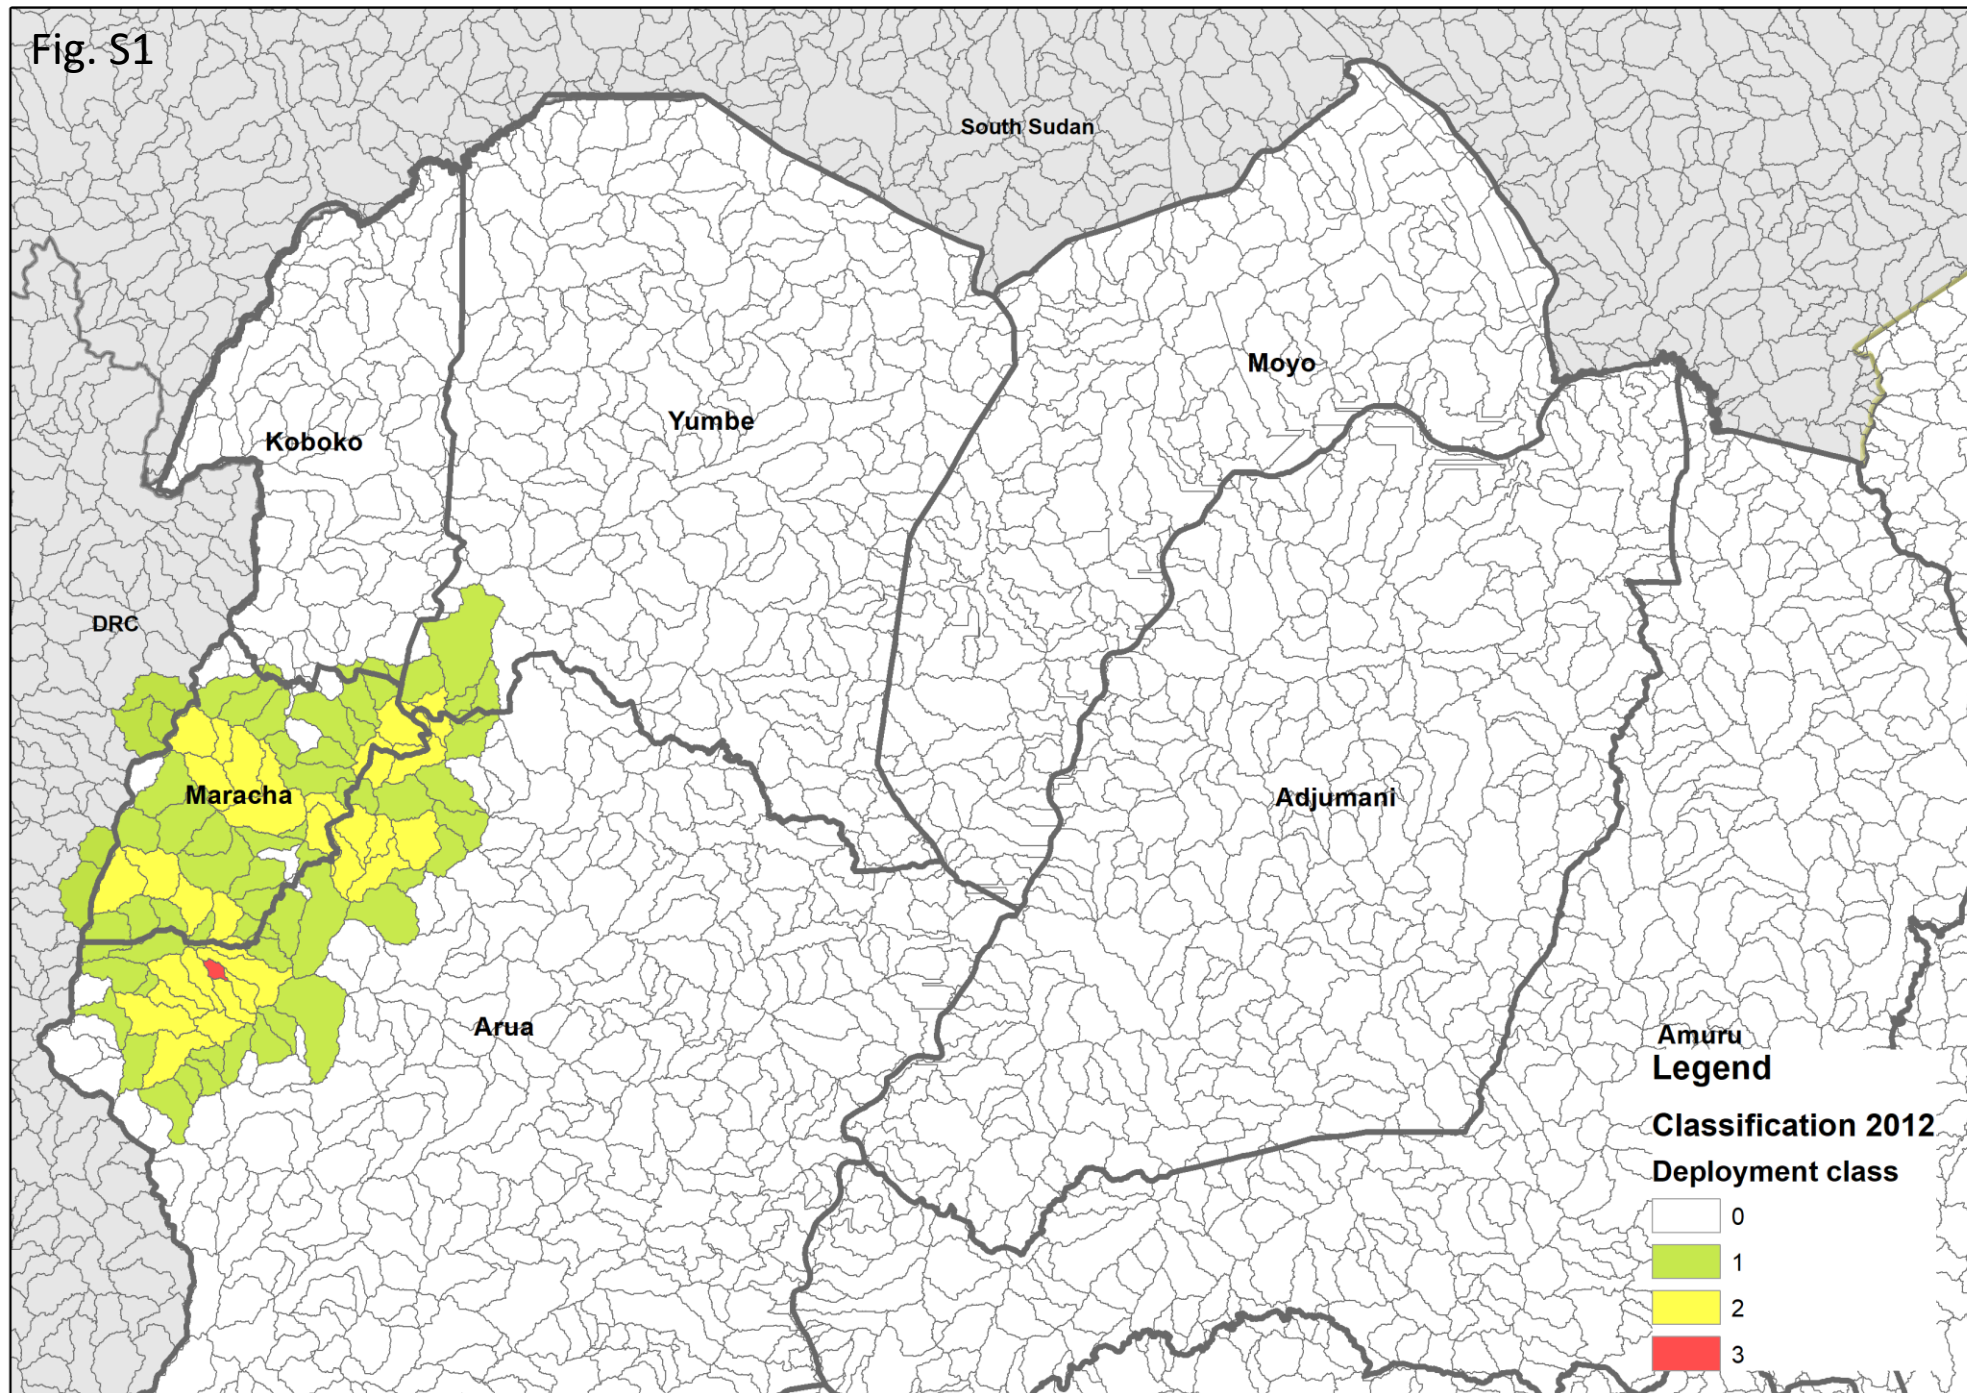

Fig. S2

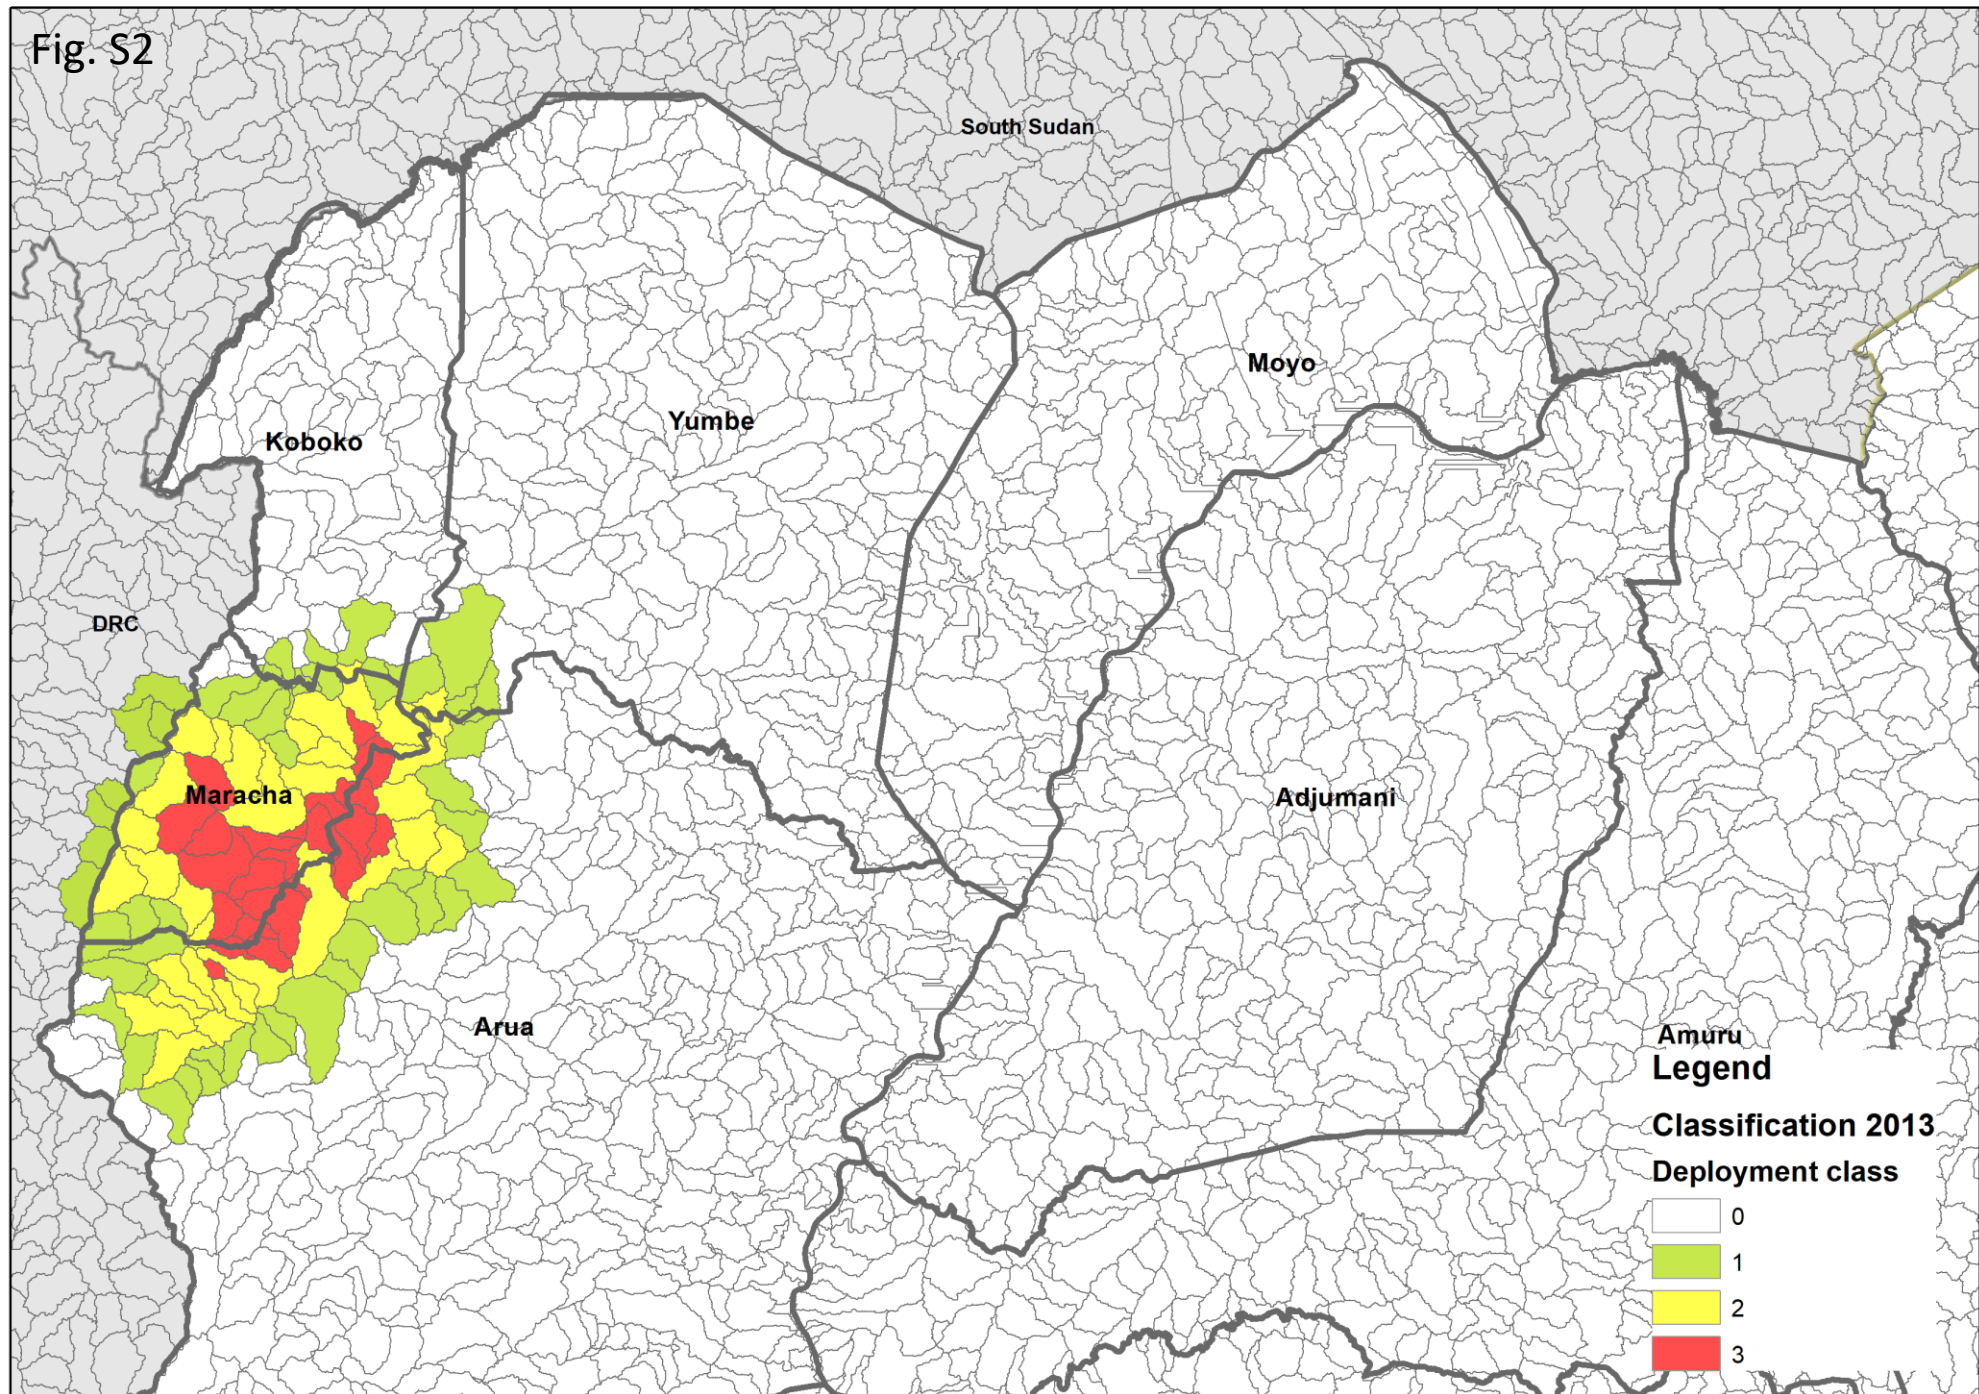



Fig. S3

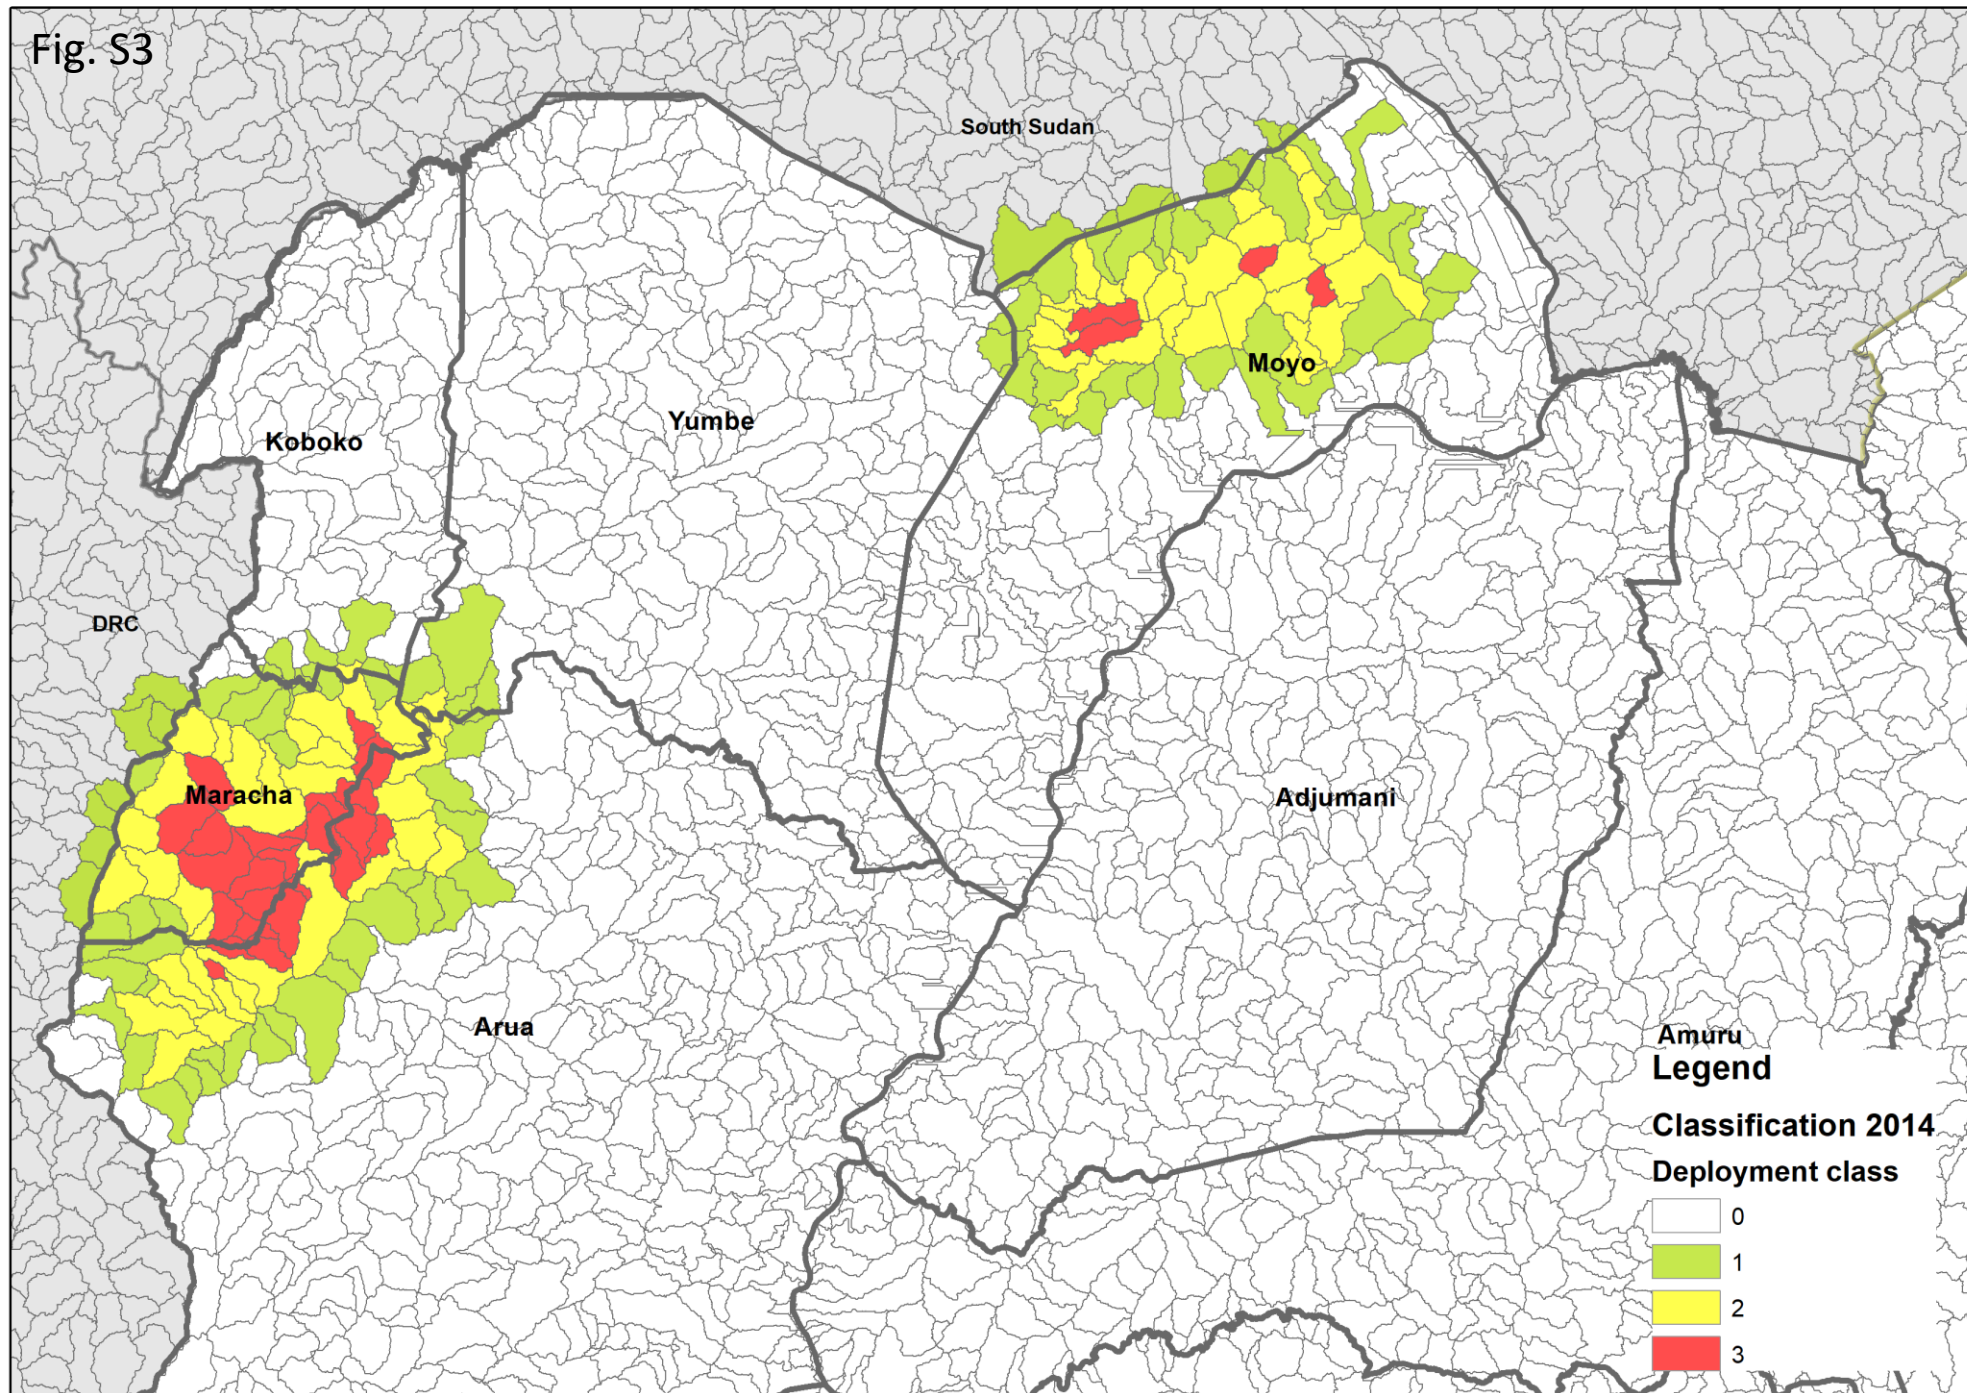

Fig. S4

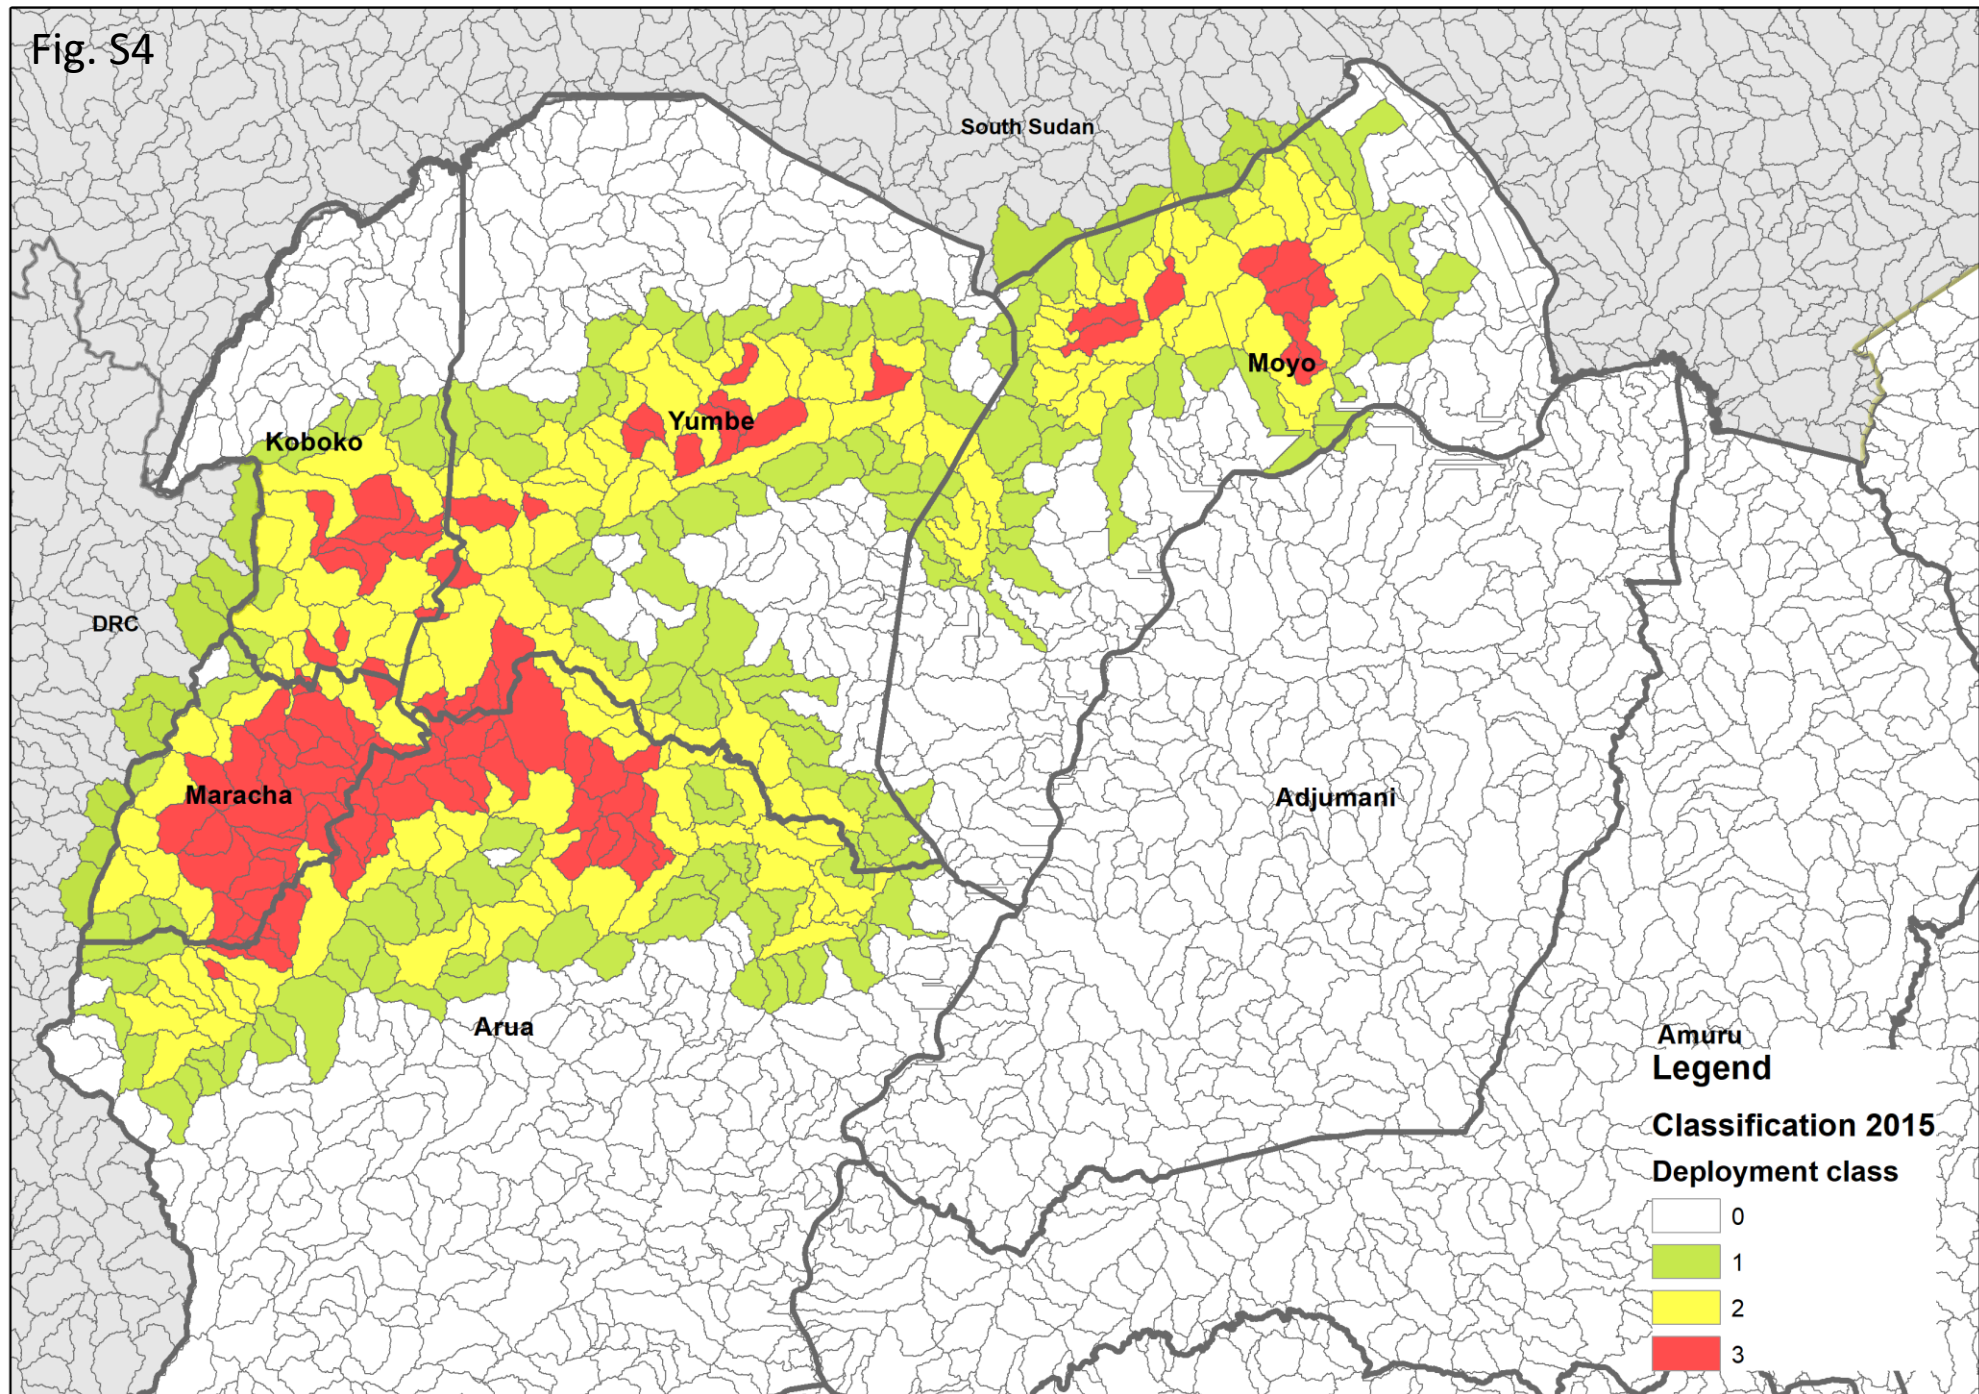



Fig. S5

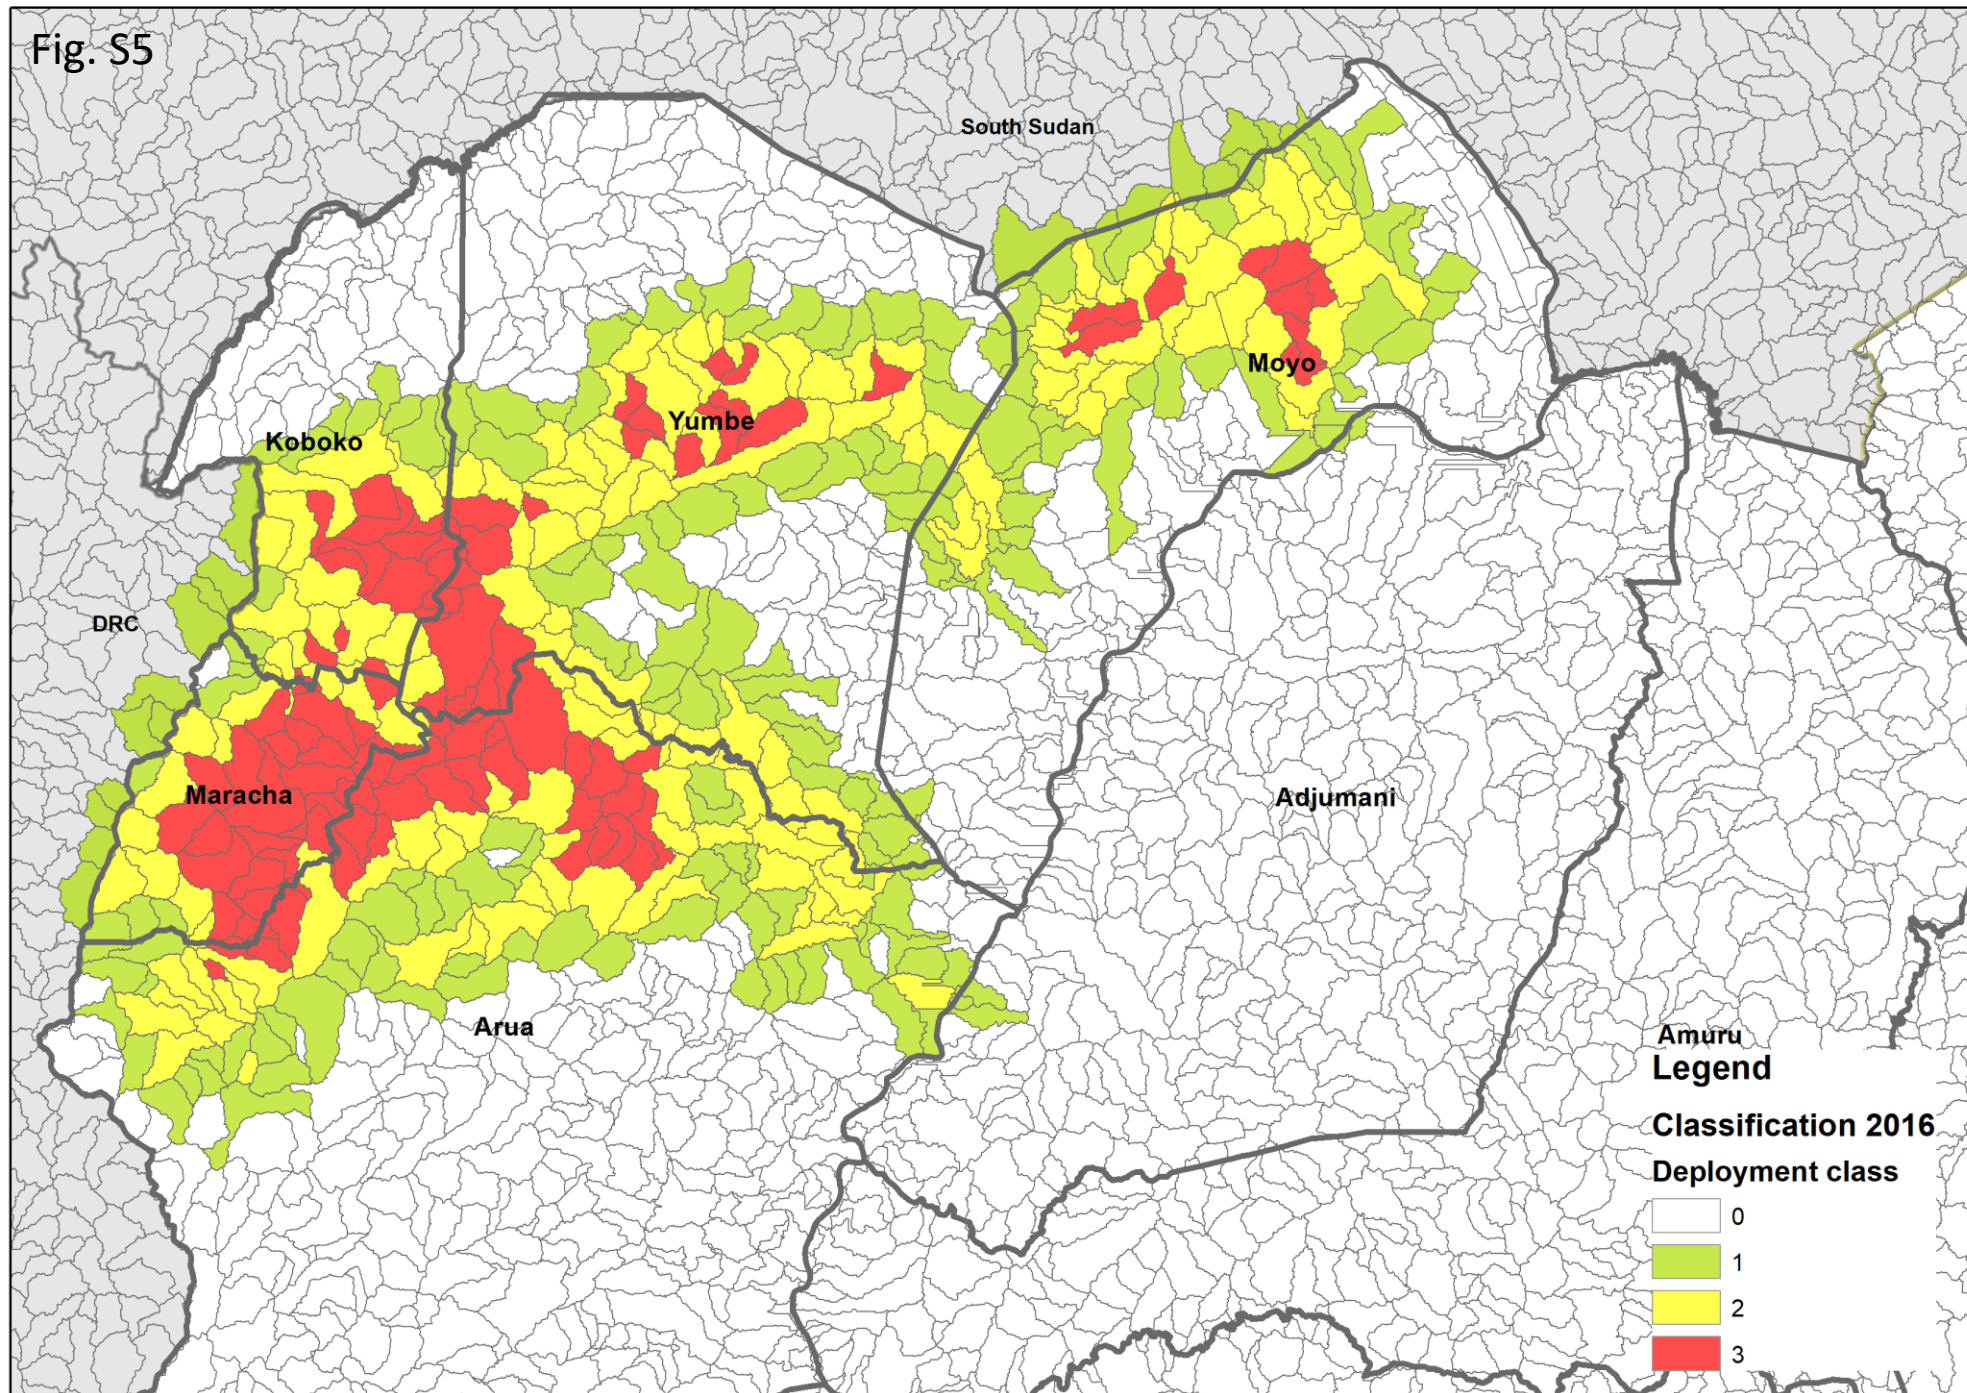

Fig. S6

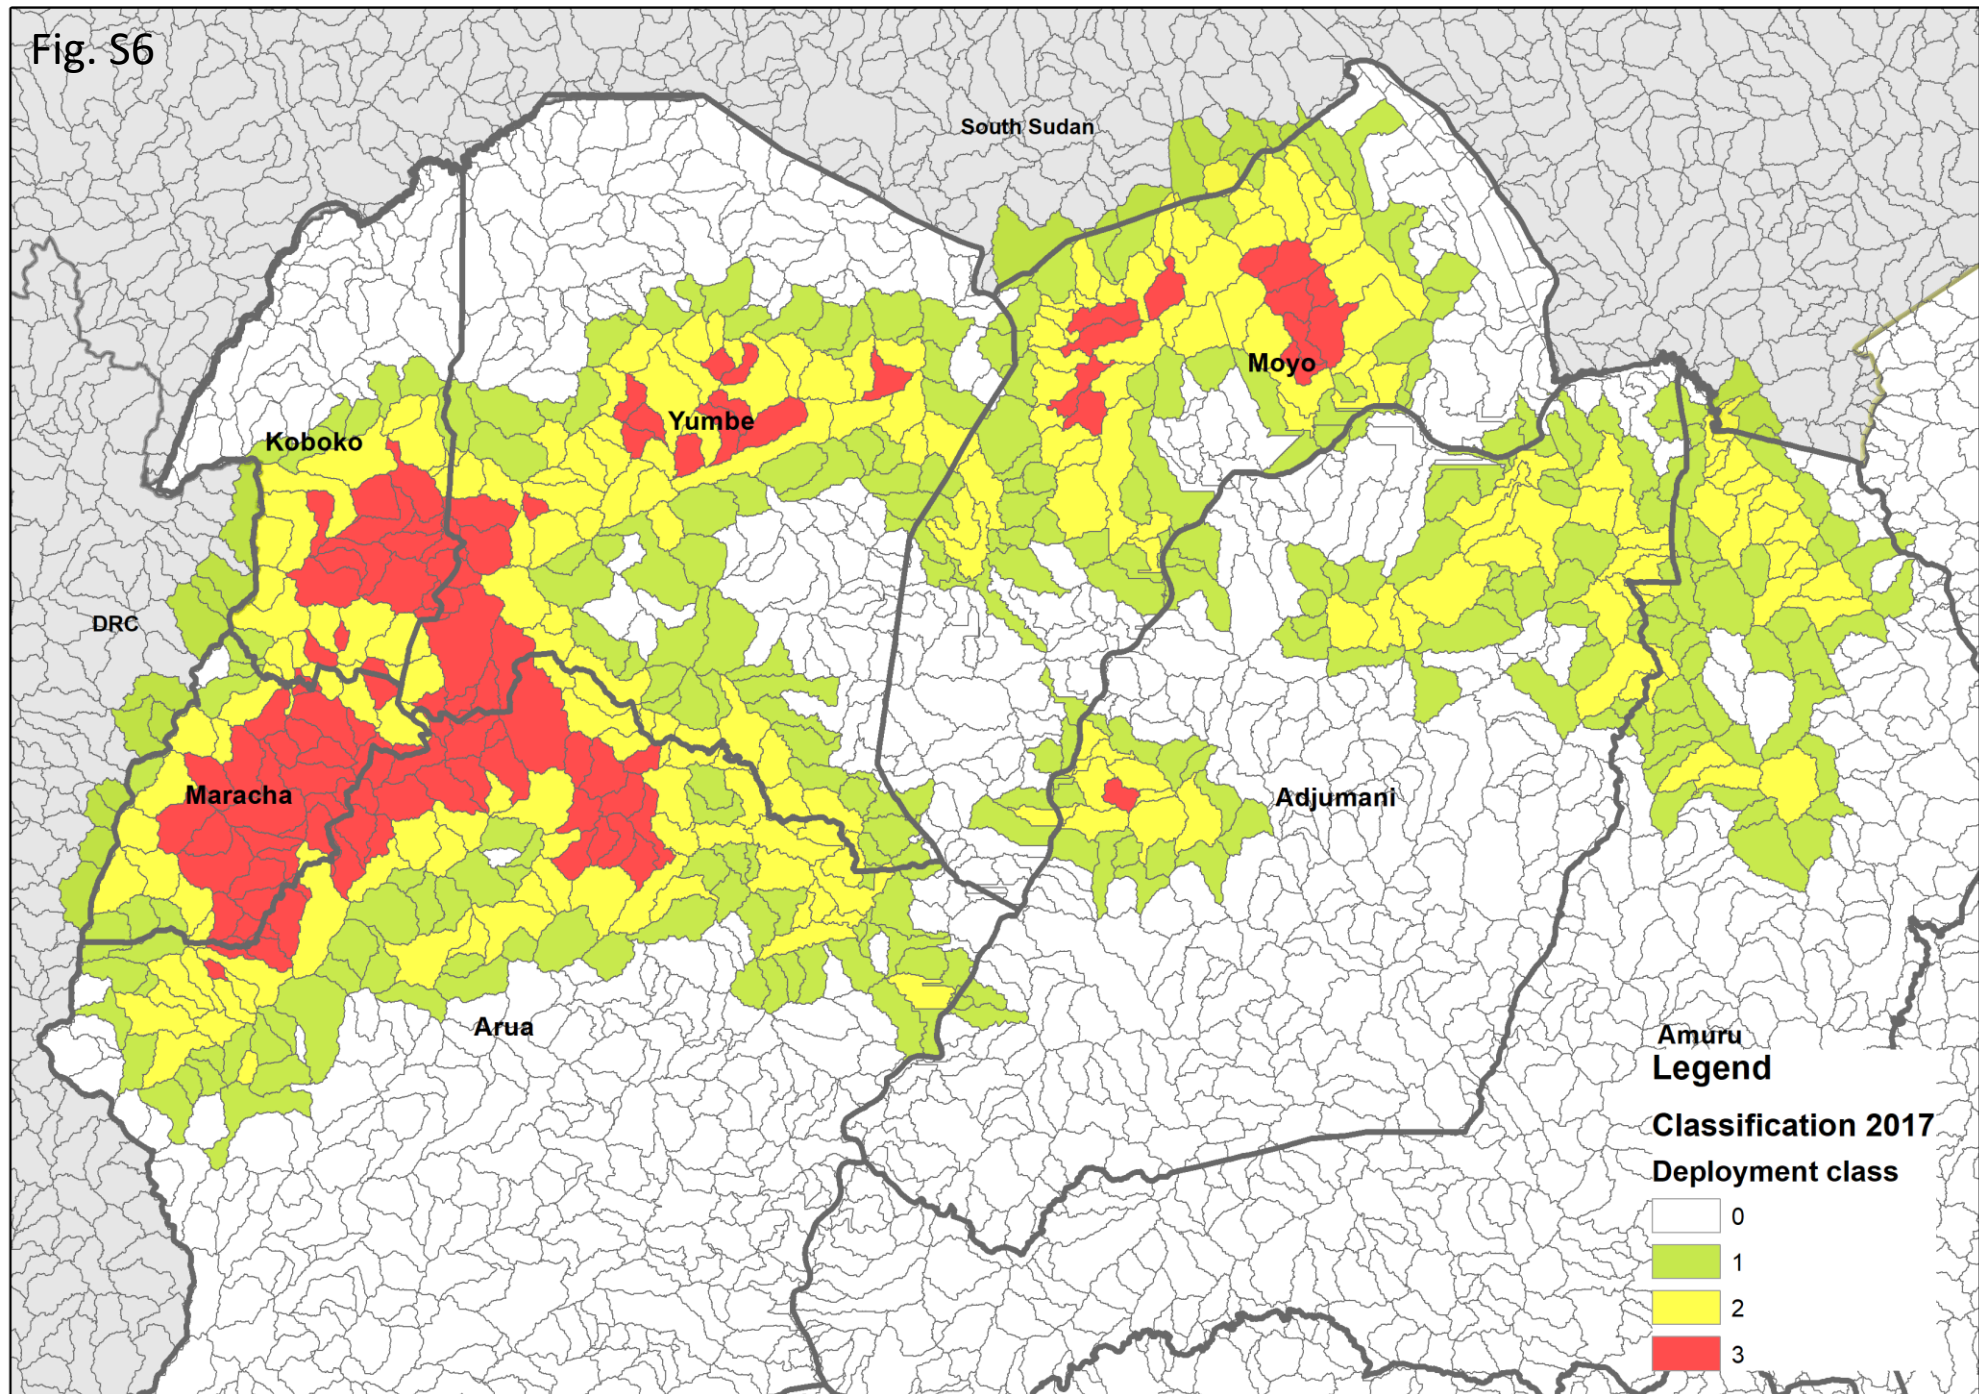



Fig. S7

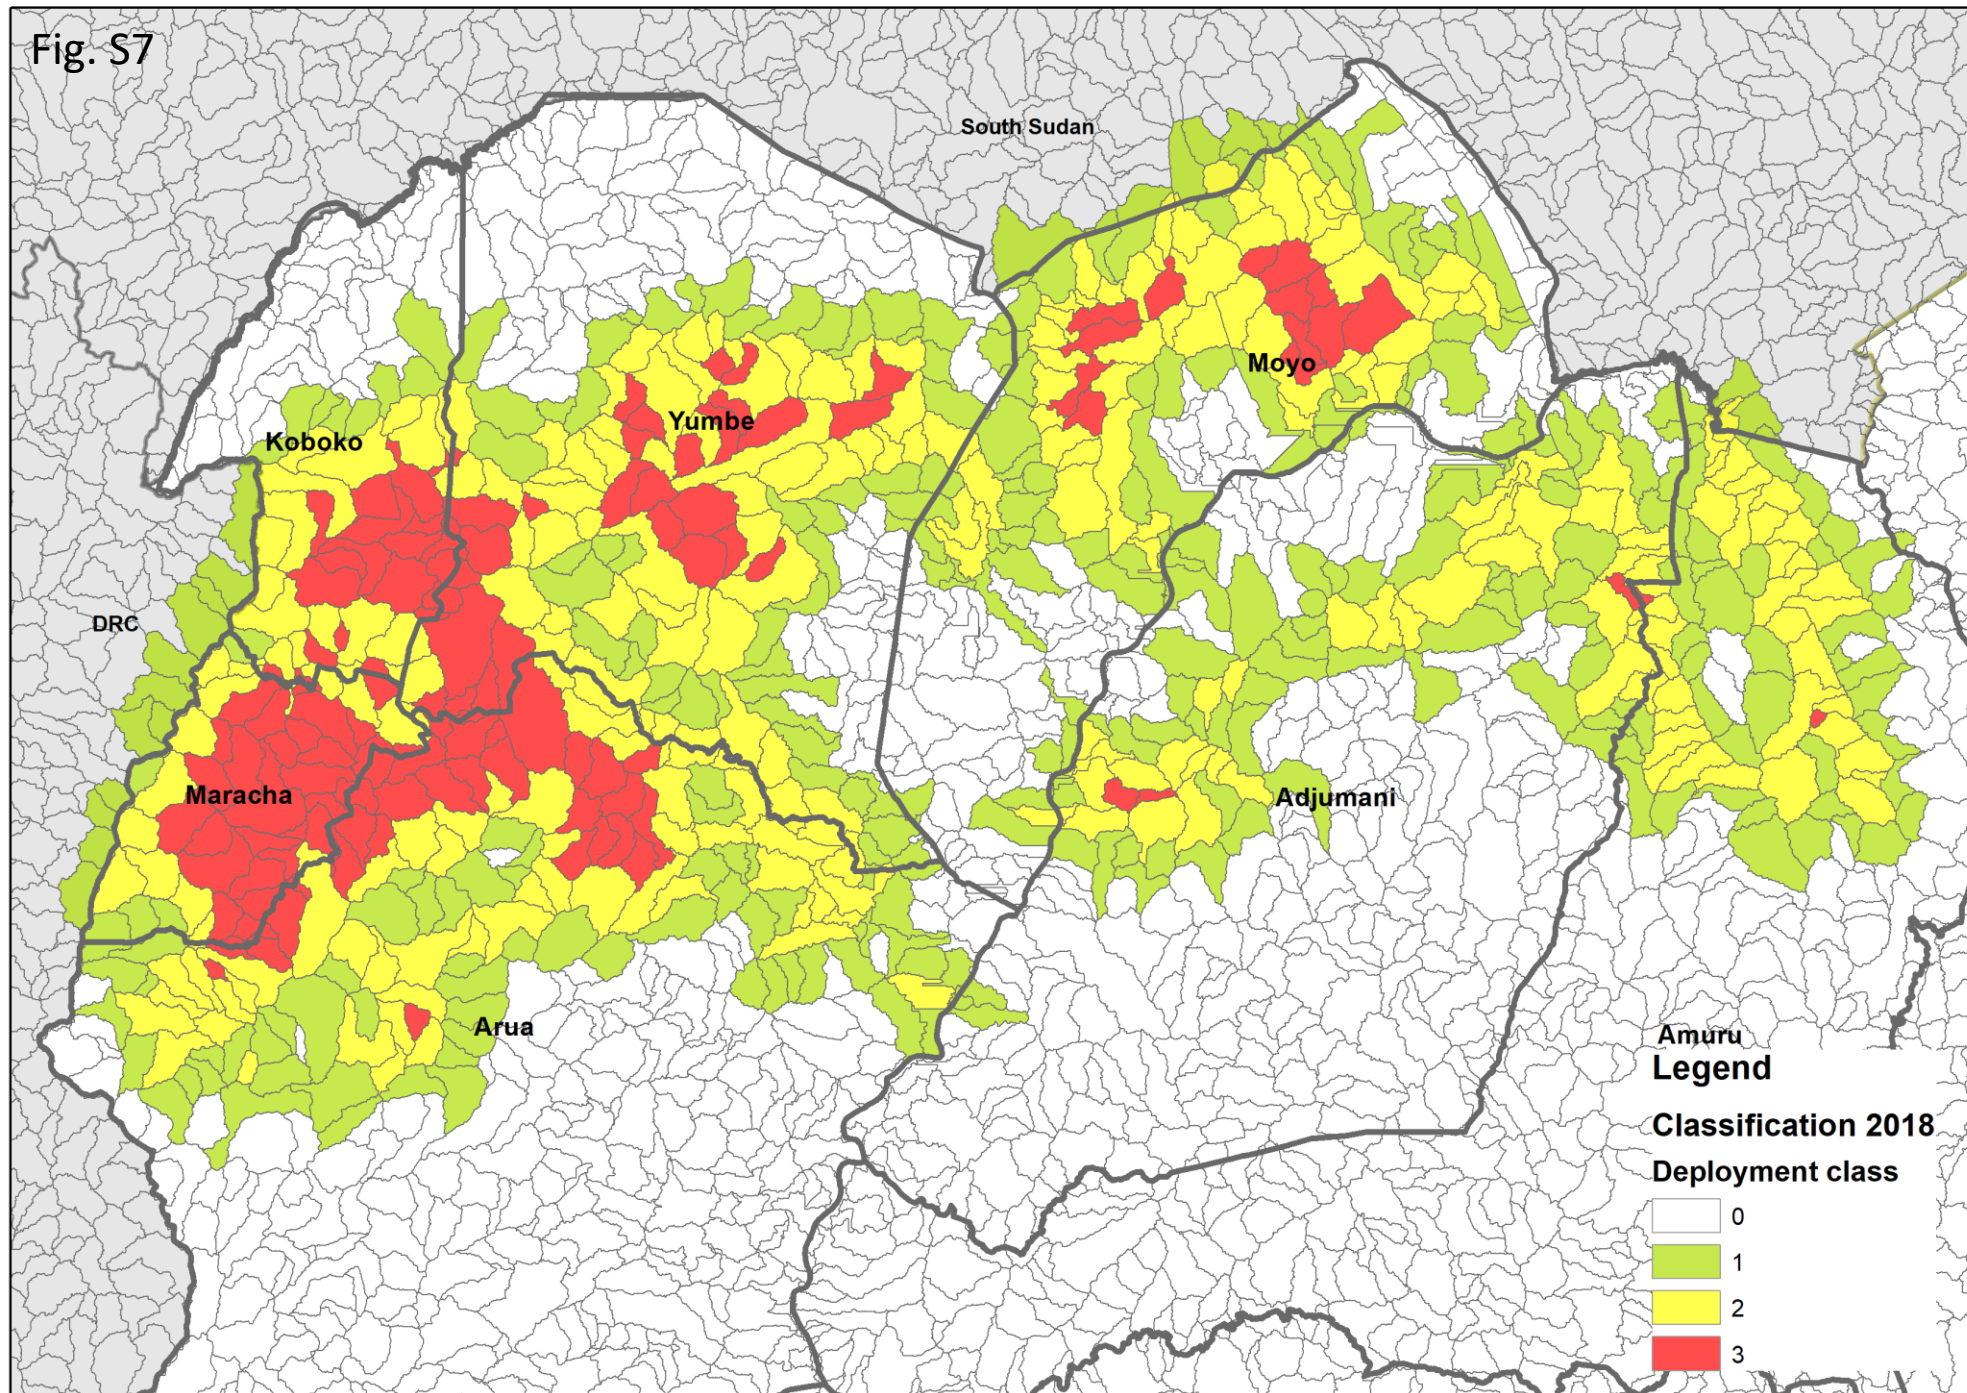

Fig. S8

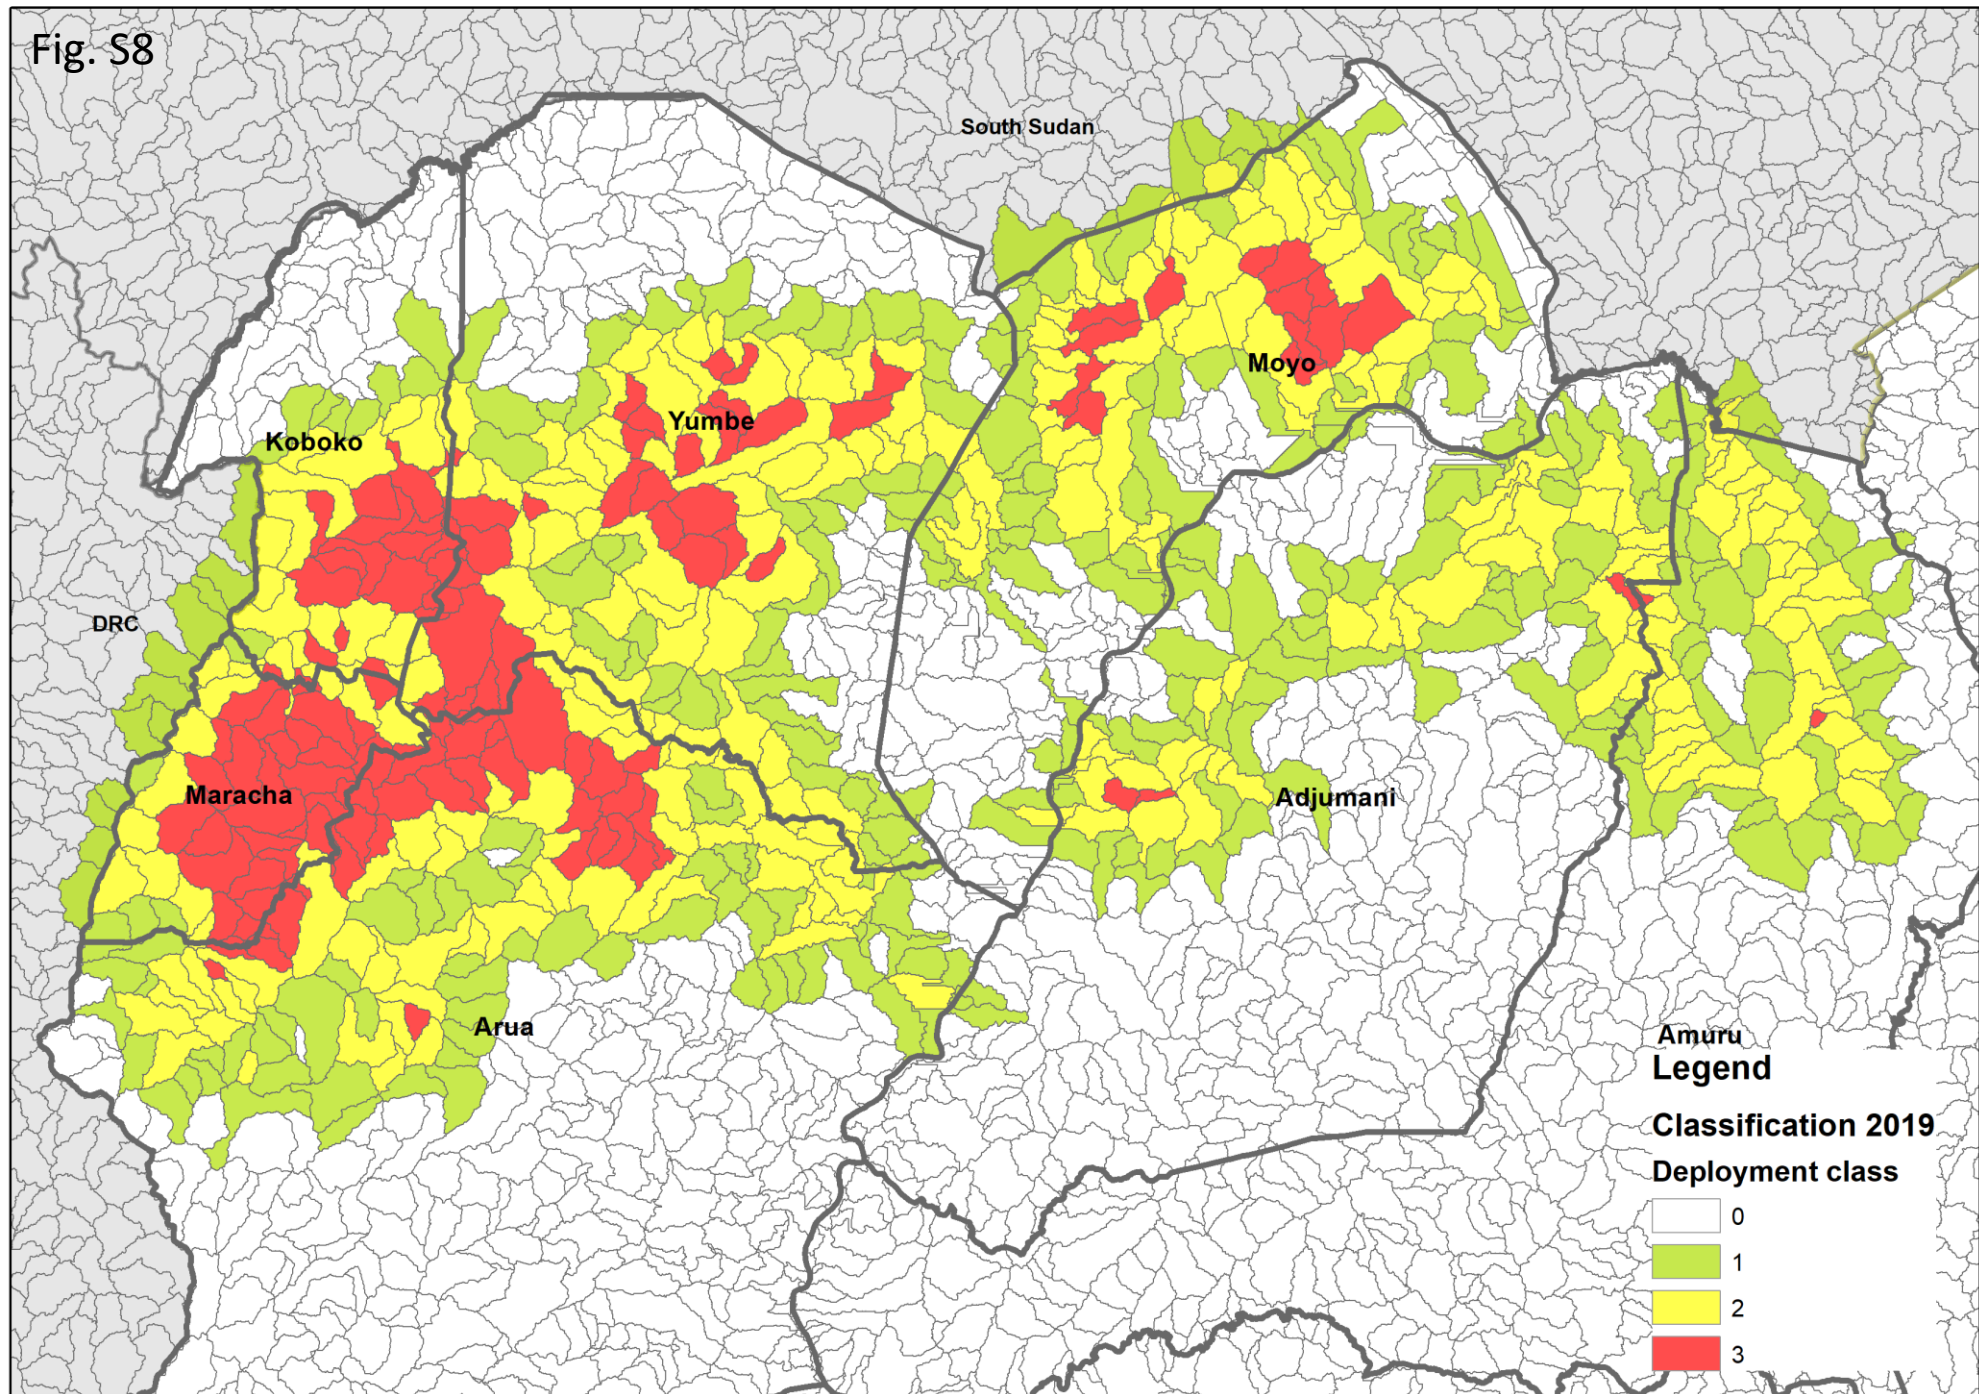

Supplement: 13071_2021_4889_MOESM1_ESM.pdf [file 13071_2021_4889_MOESM1_ESM.pdf]
