# Supplementary material for: Estimating the impact of Tiny Targets in reducing the incidence of Gambian sleeping sickness in the North-west Uganda focus
Source: PubMed Central journal article supplement (PMC8371857; doi:10.1186/s13071-021-04889-x), 2021-08-18

Fig. S9

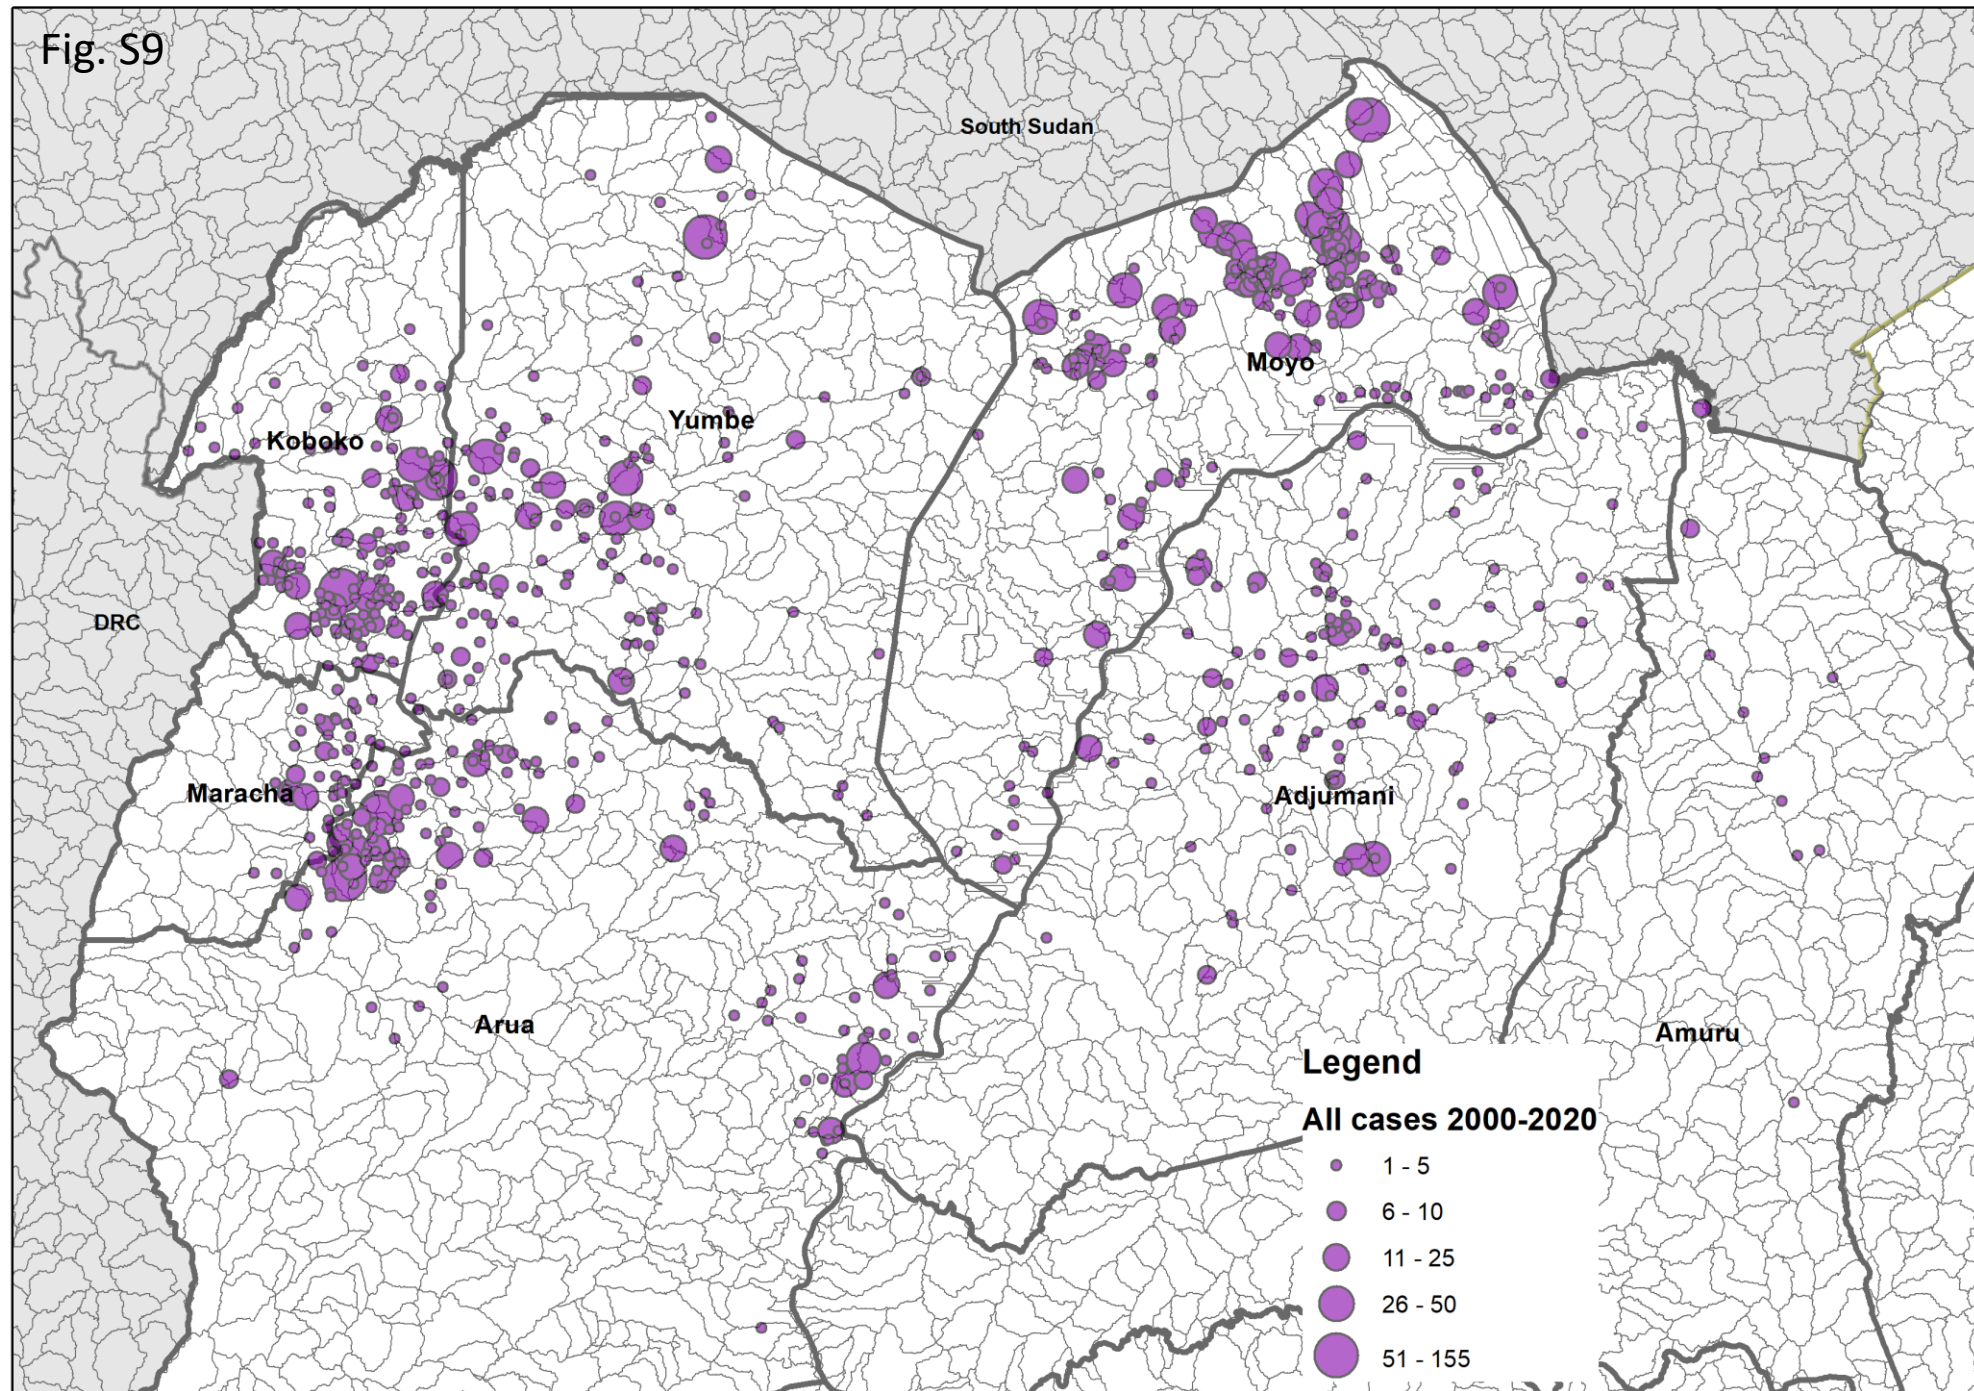



Fig. S10

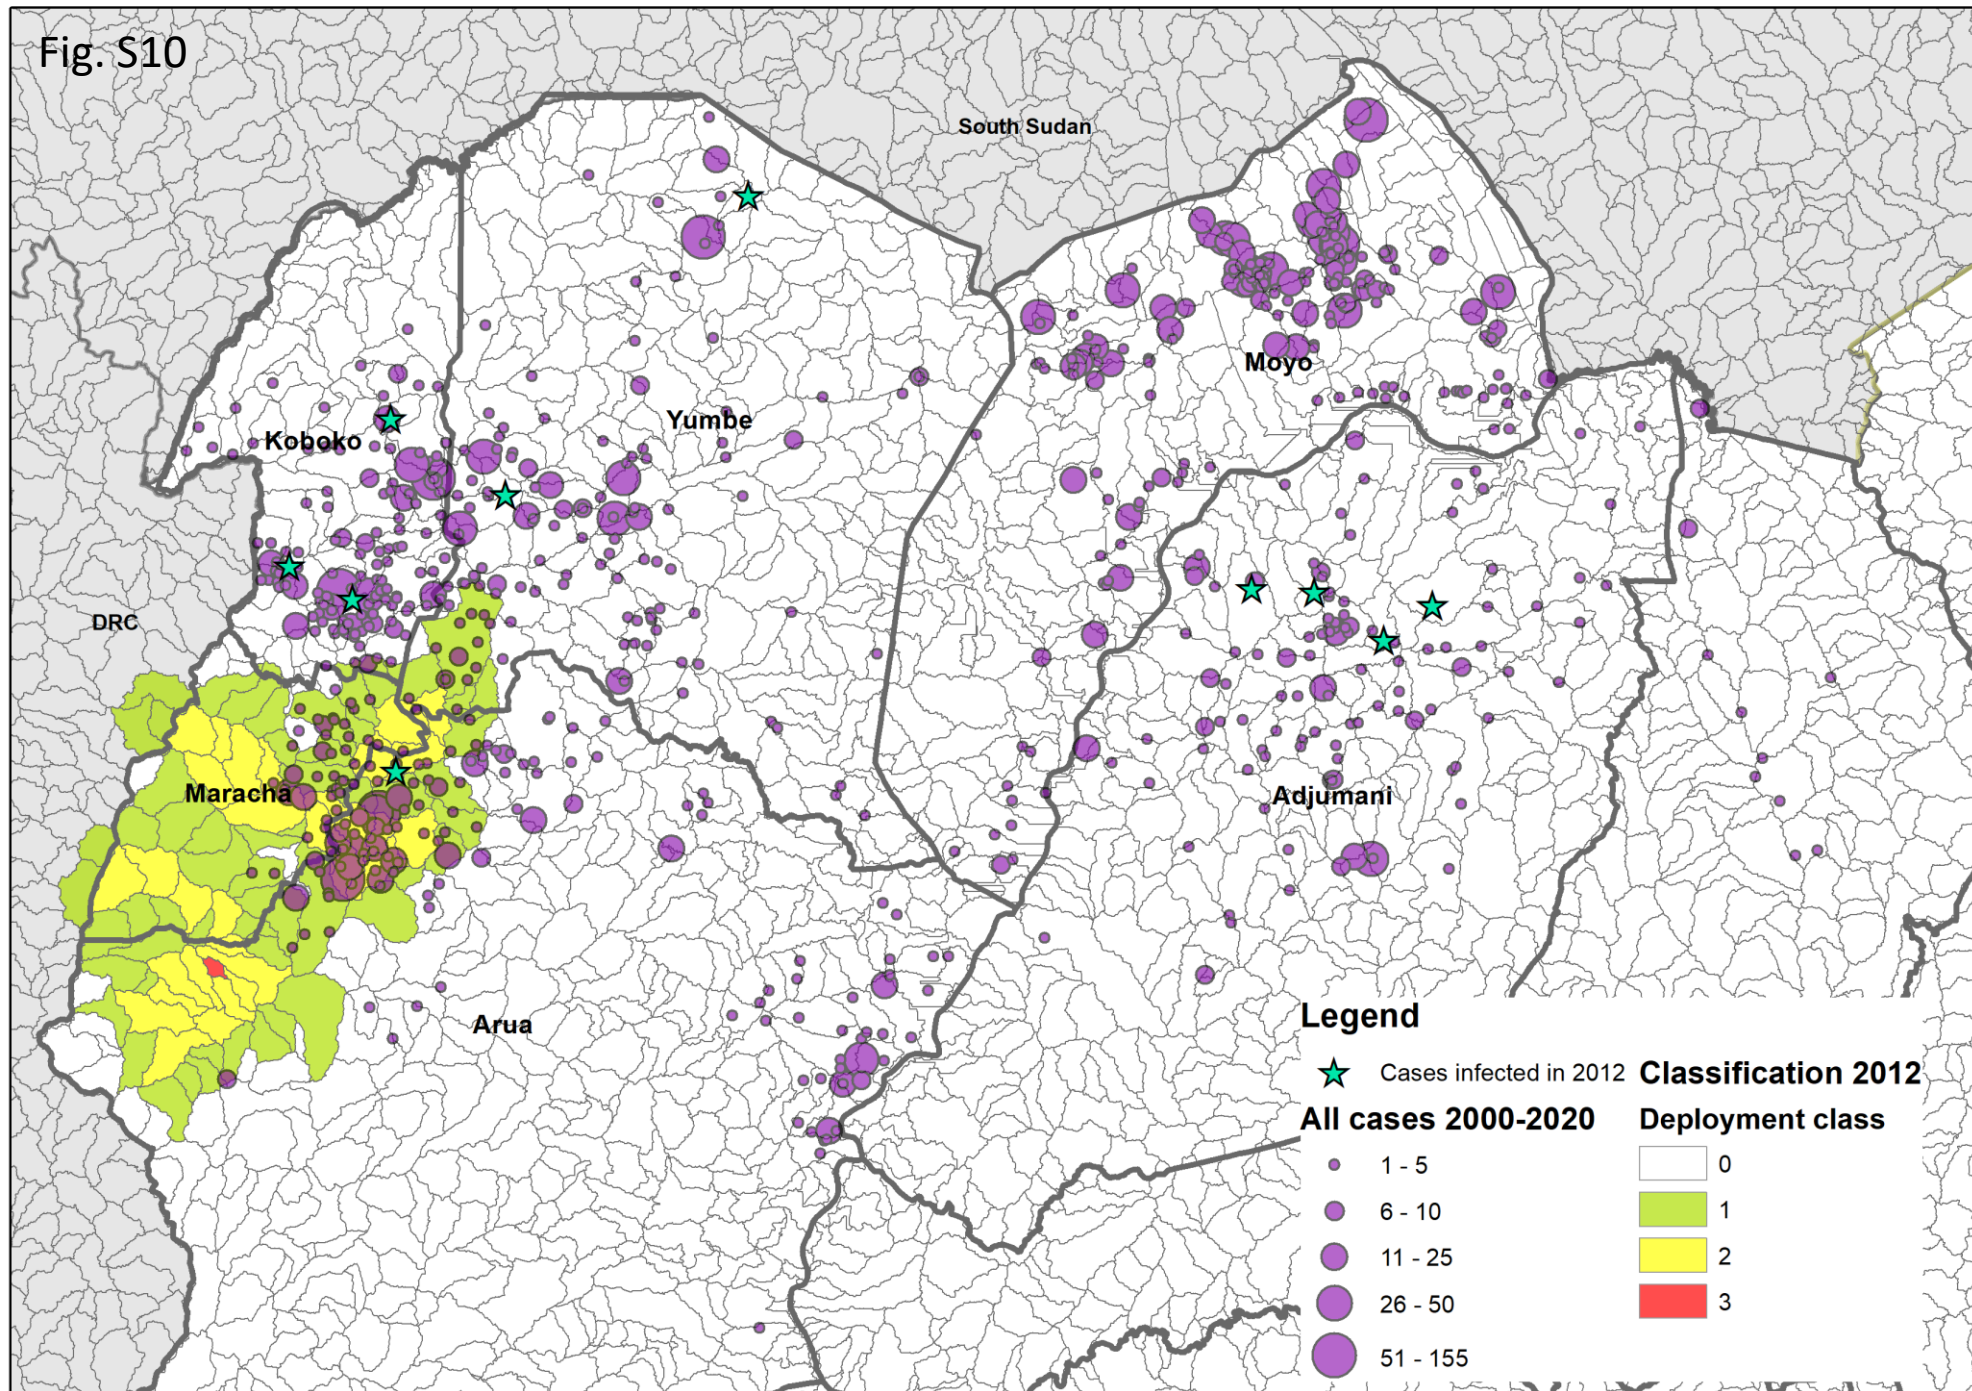



Fig. S11

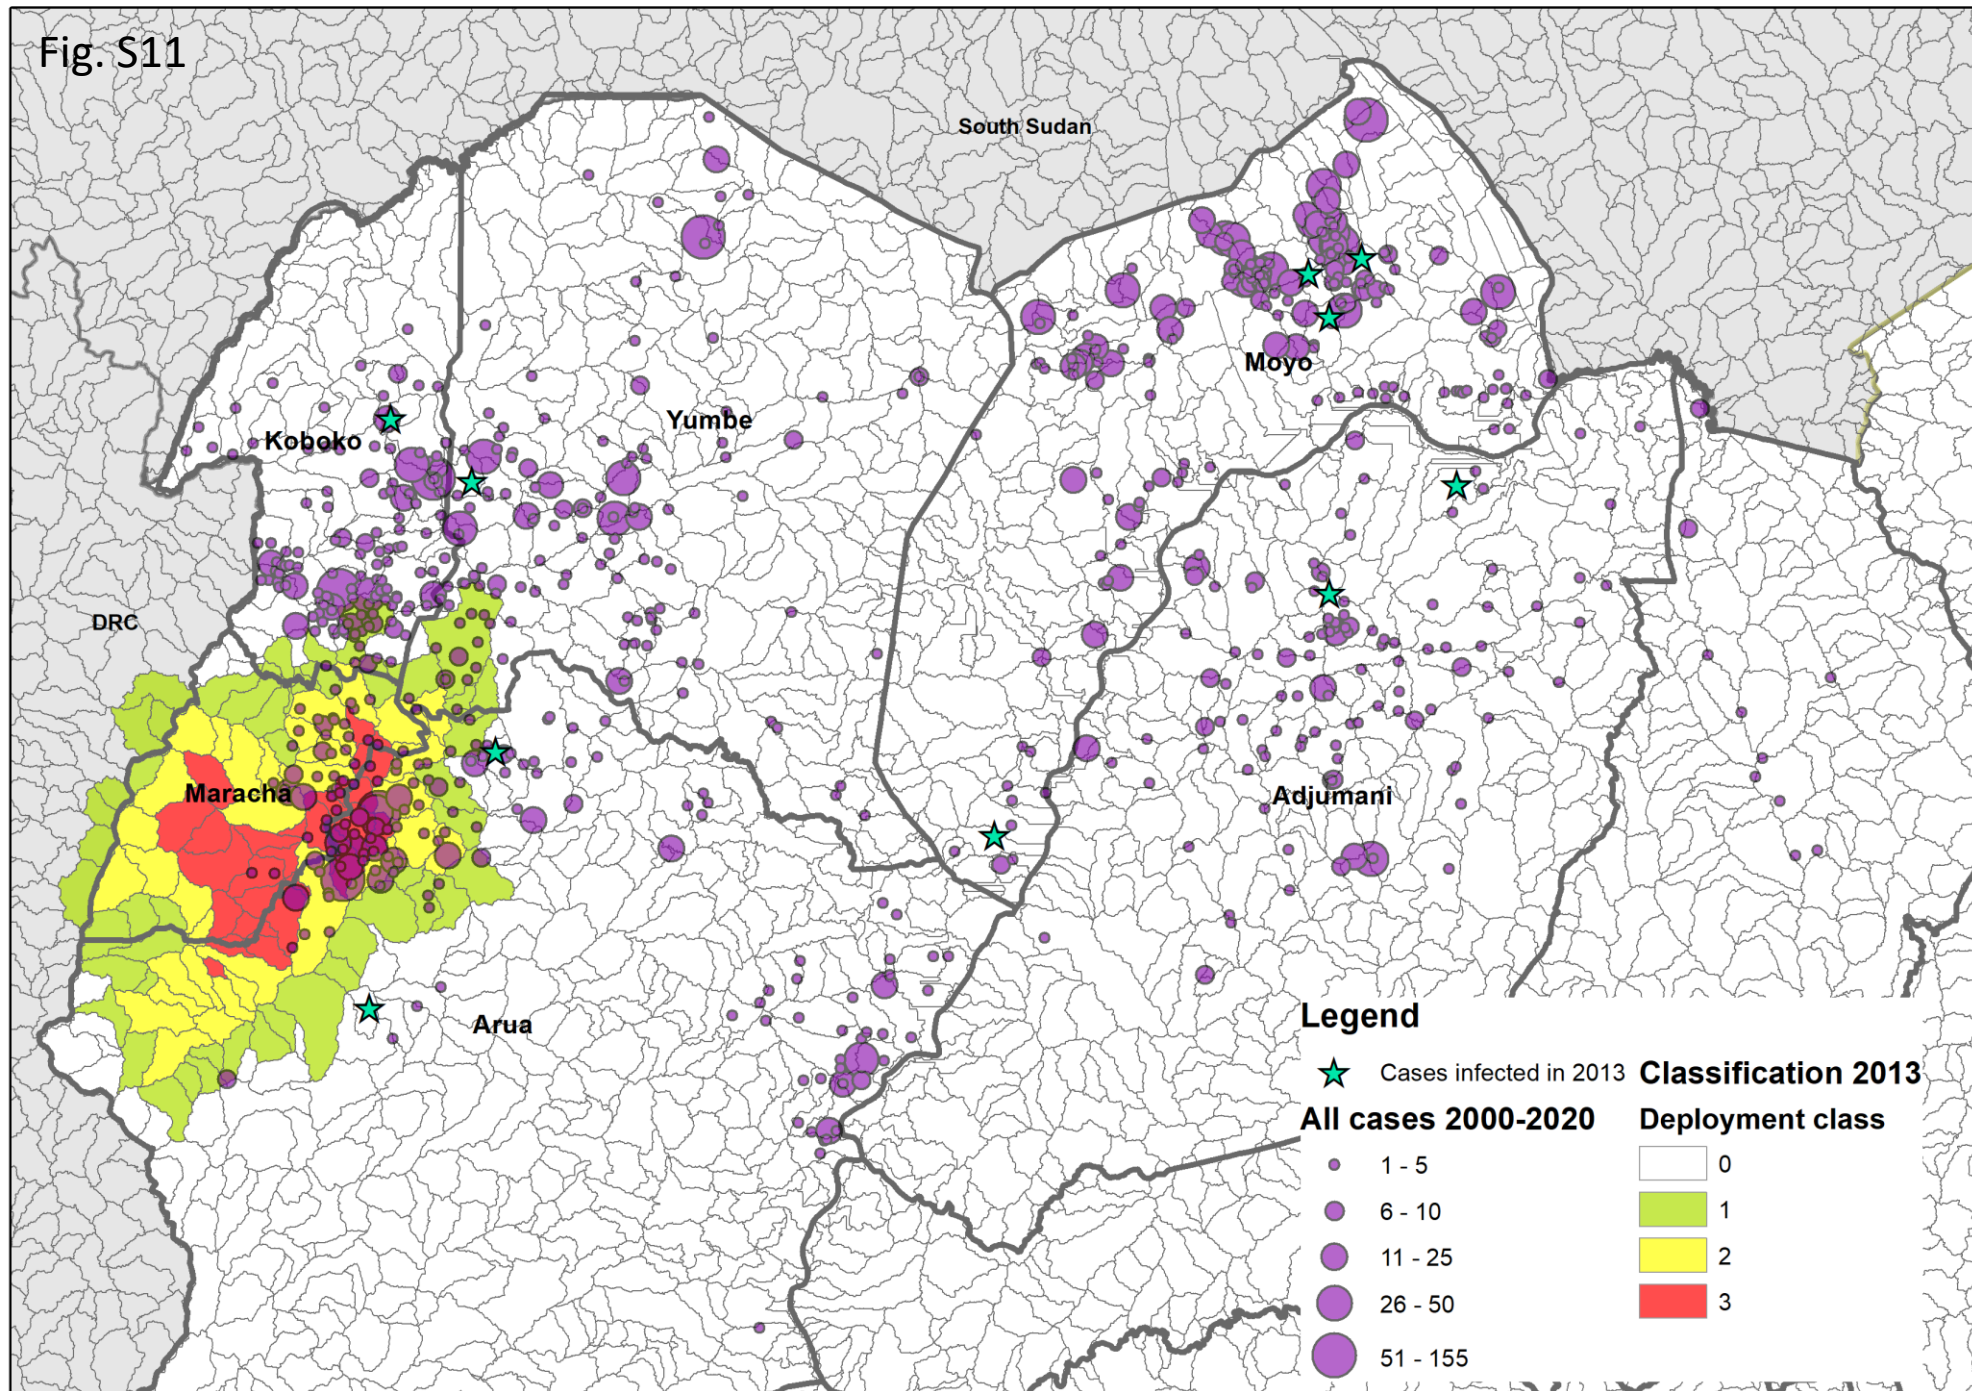



Fig. S12

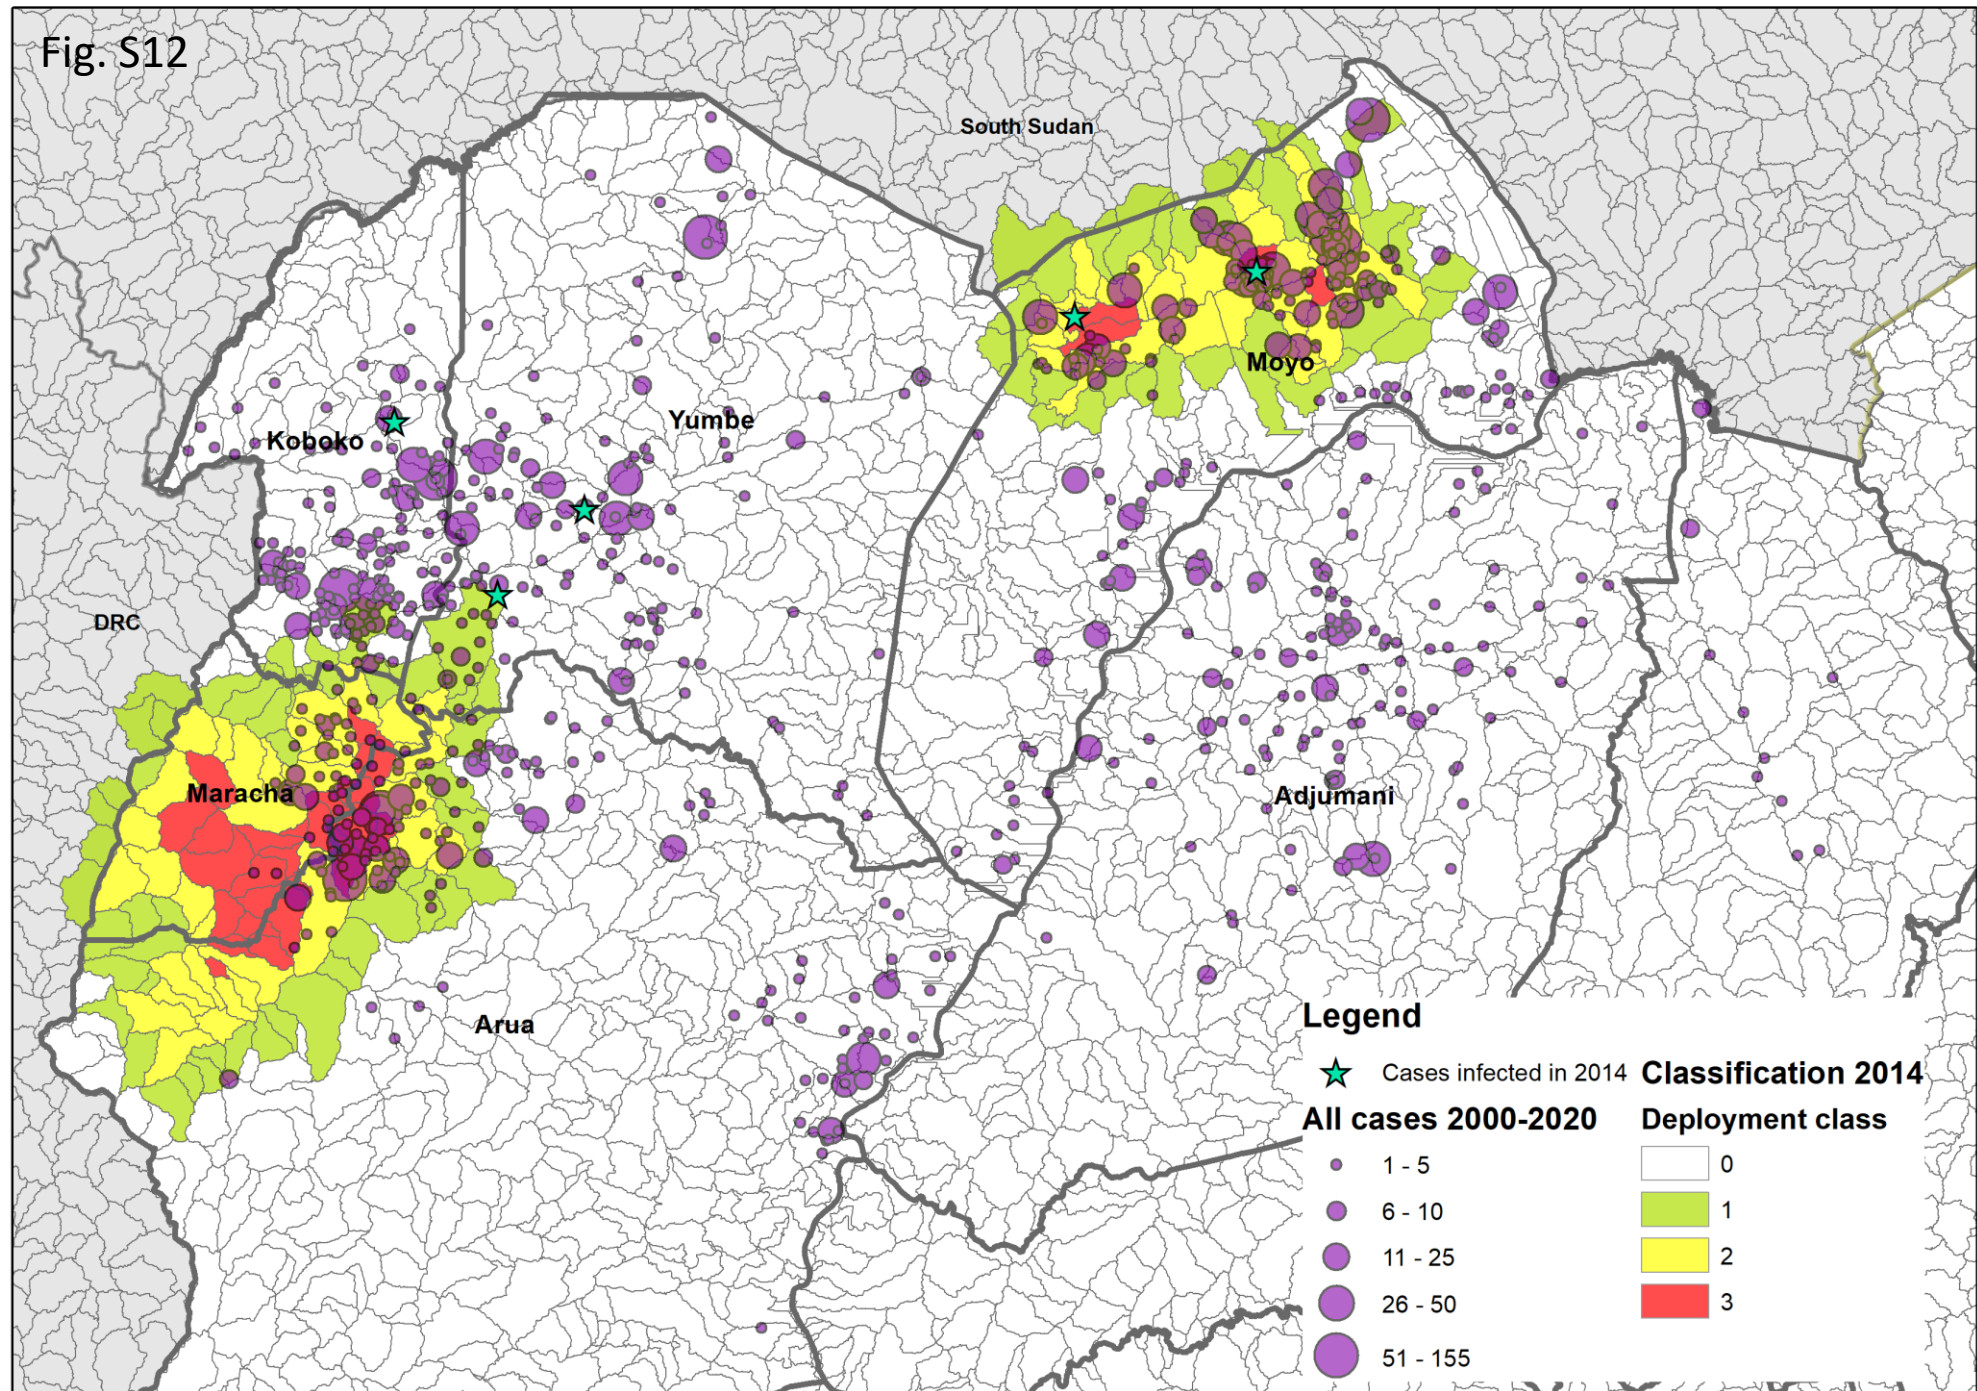



Fig. S13

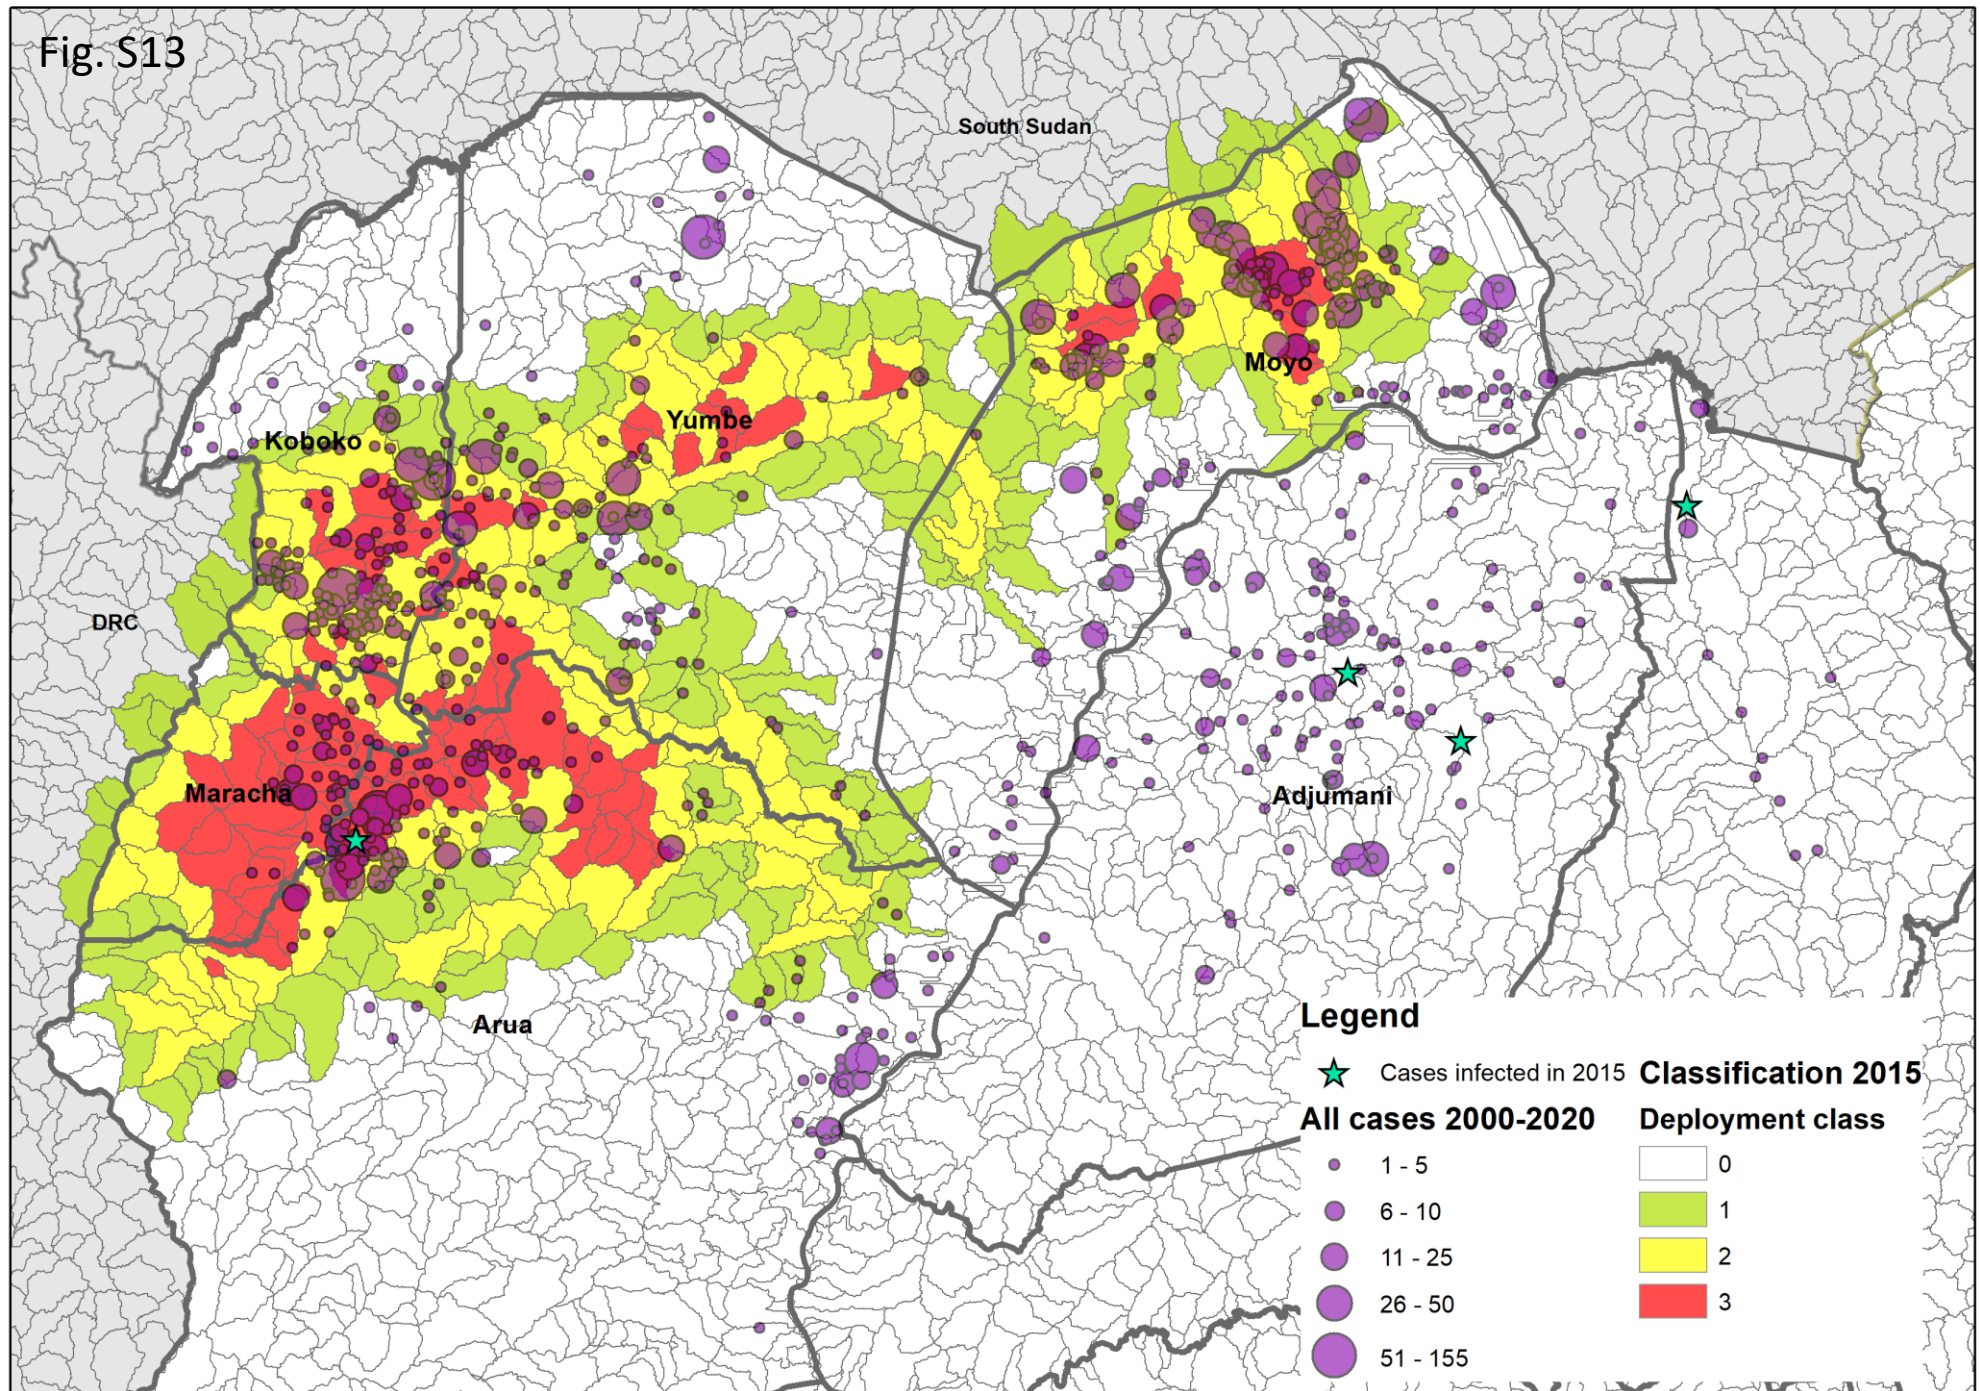



Fig. S14

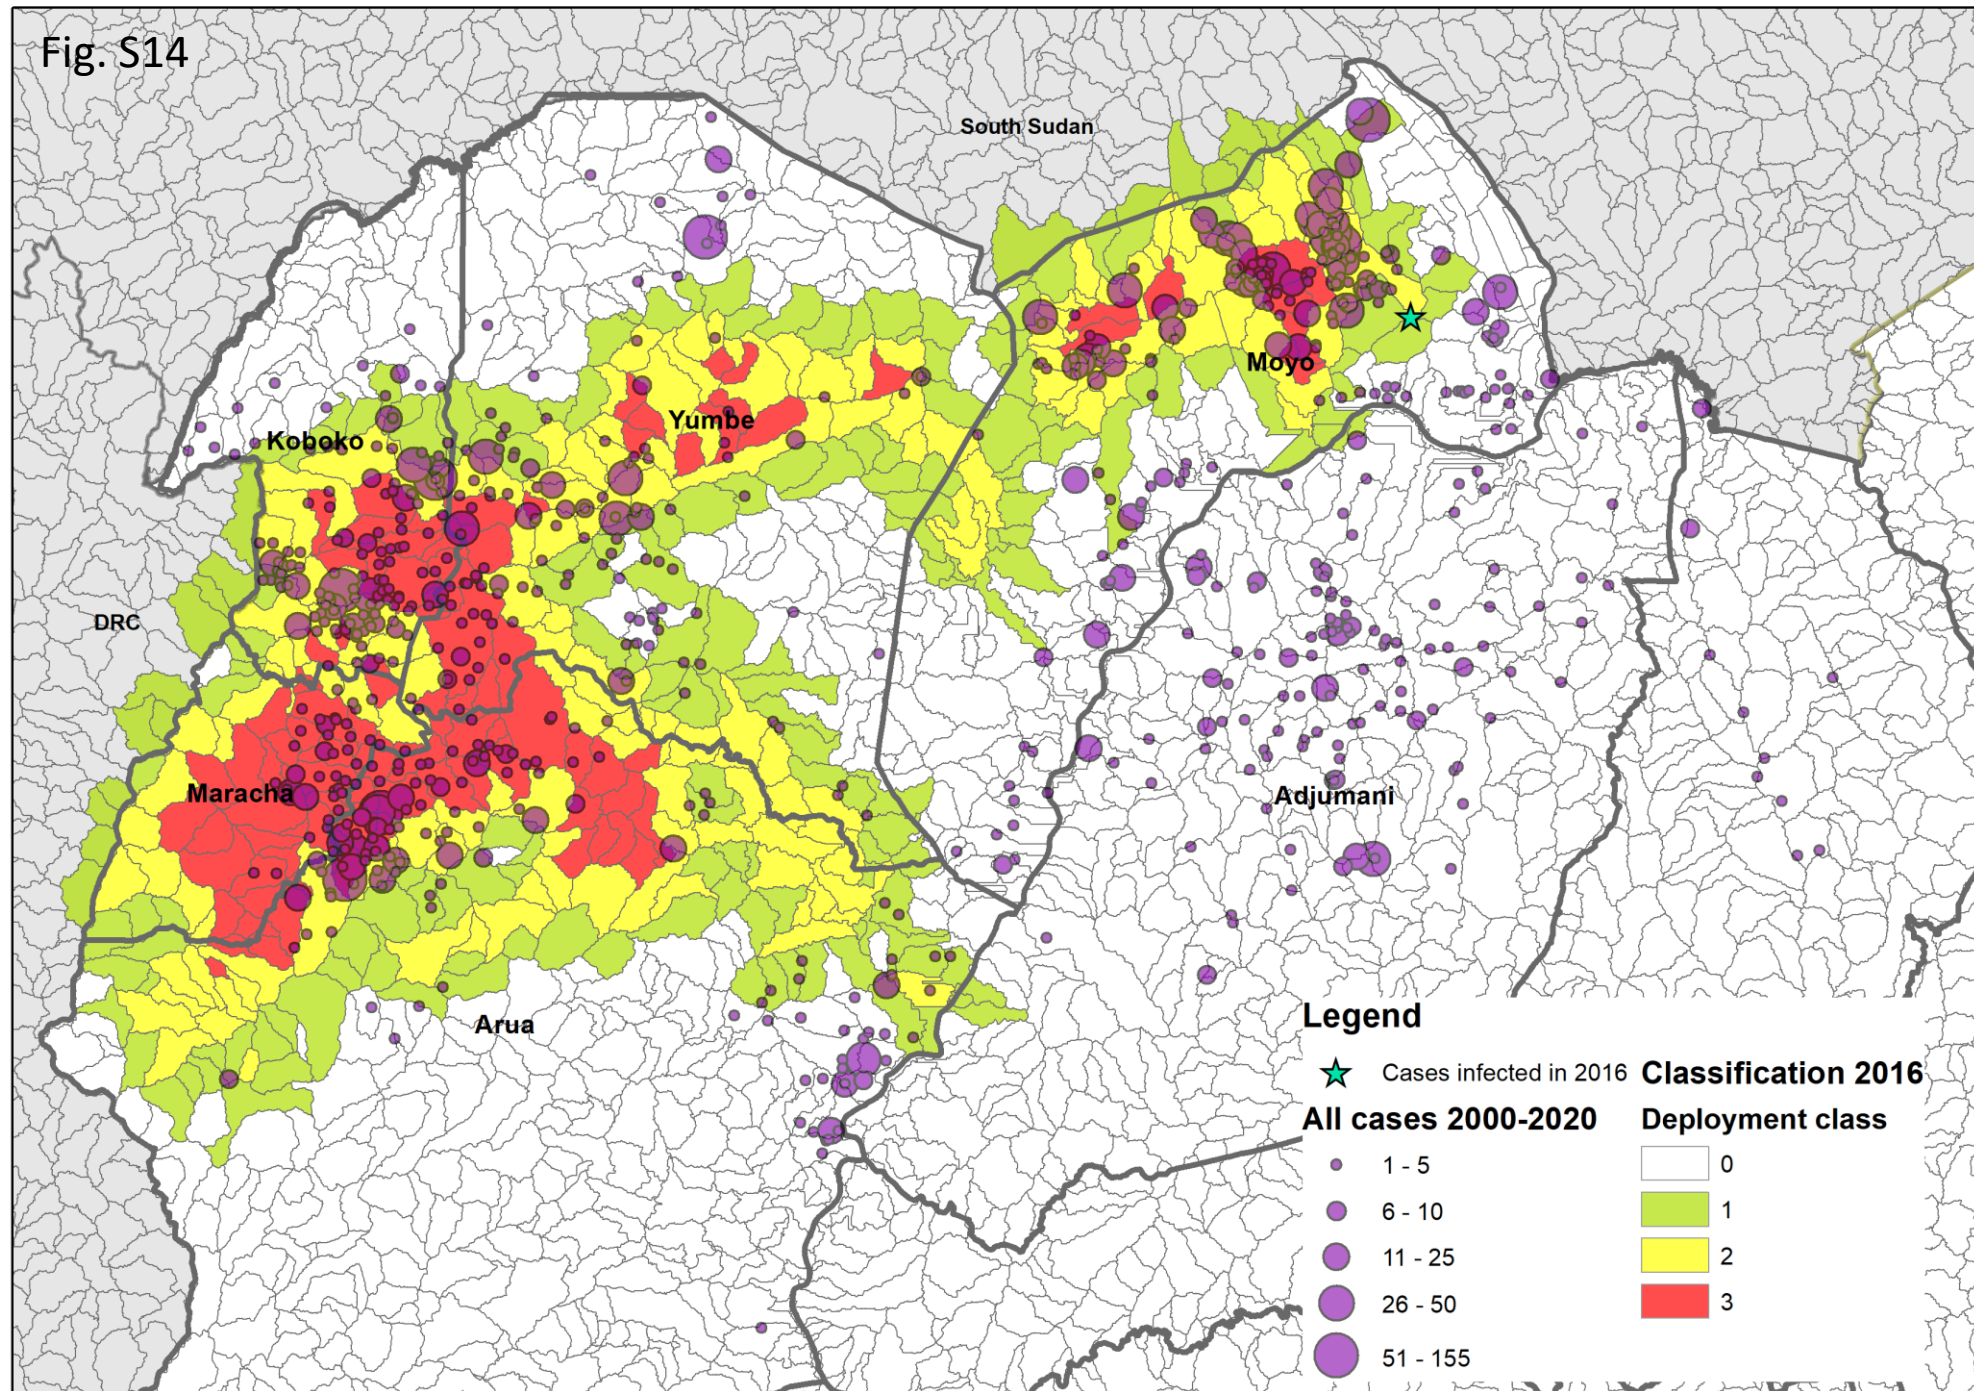



Fig. S15

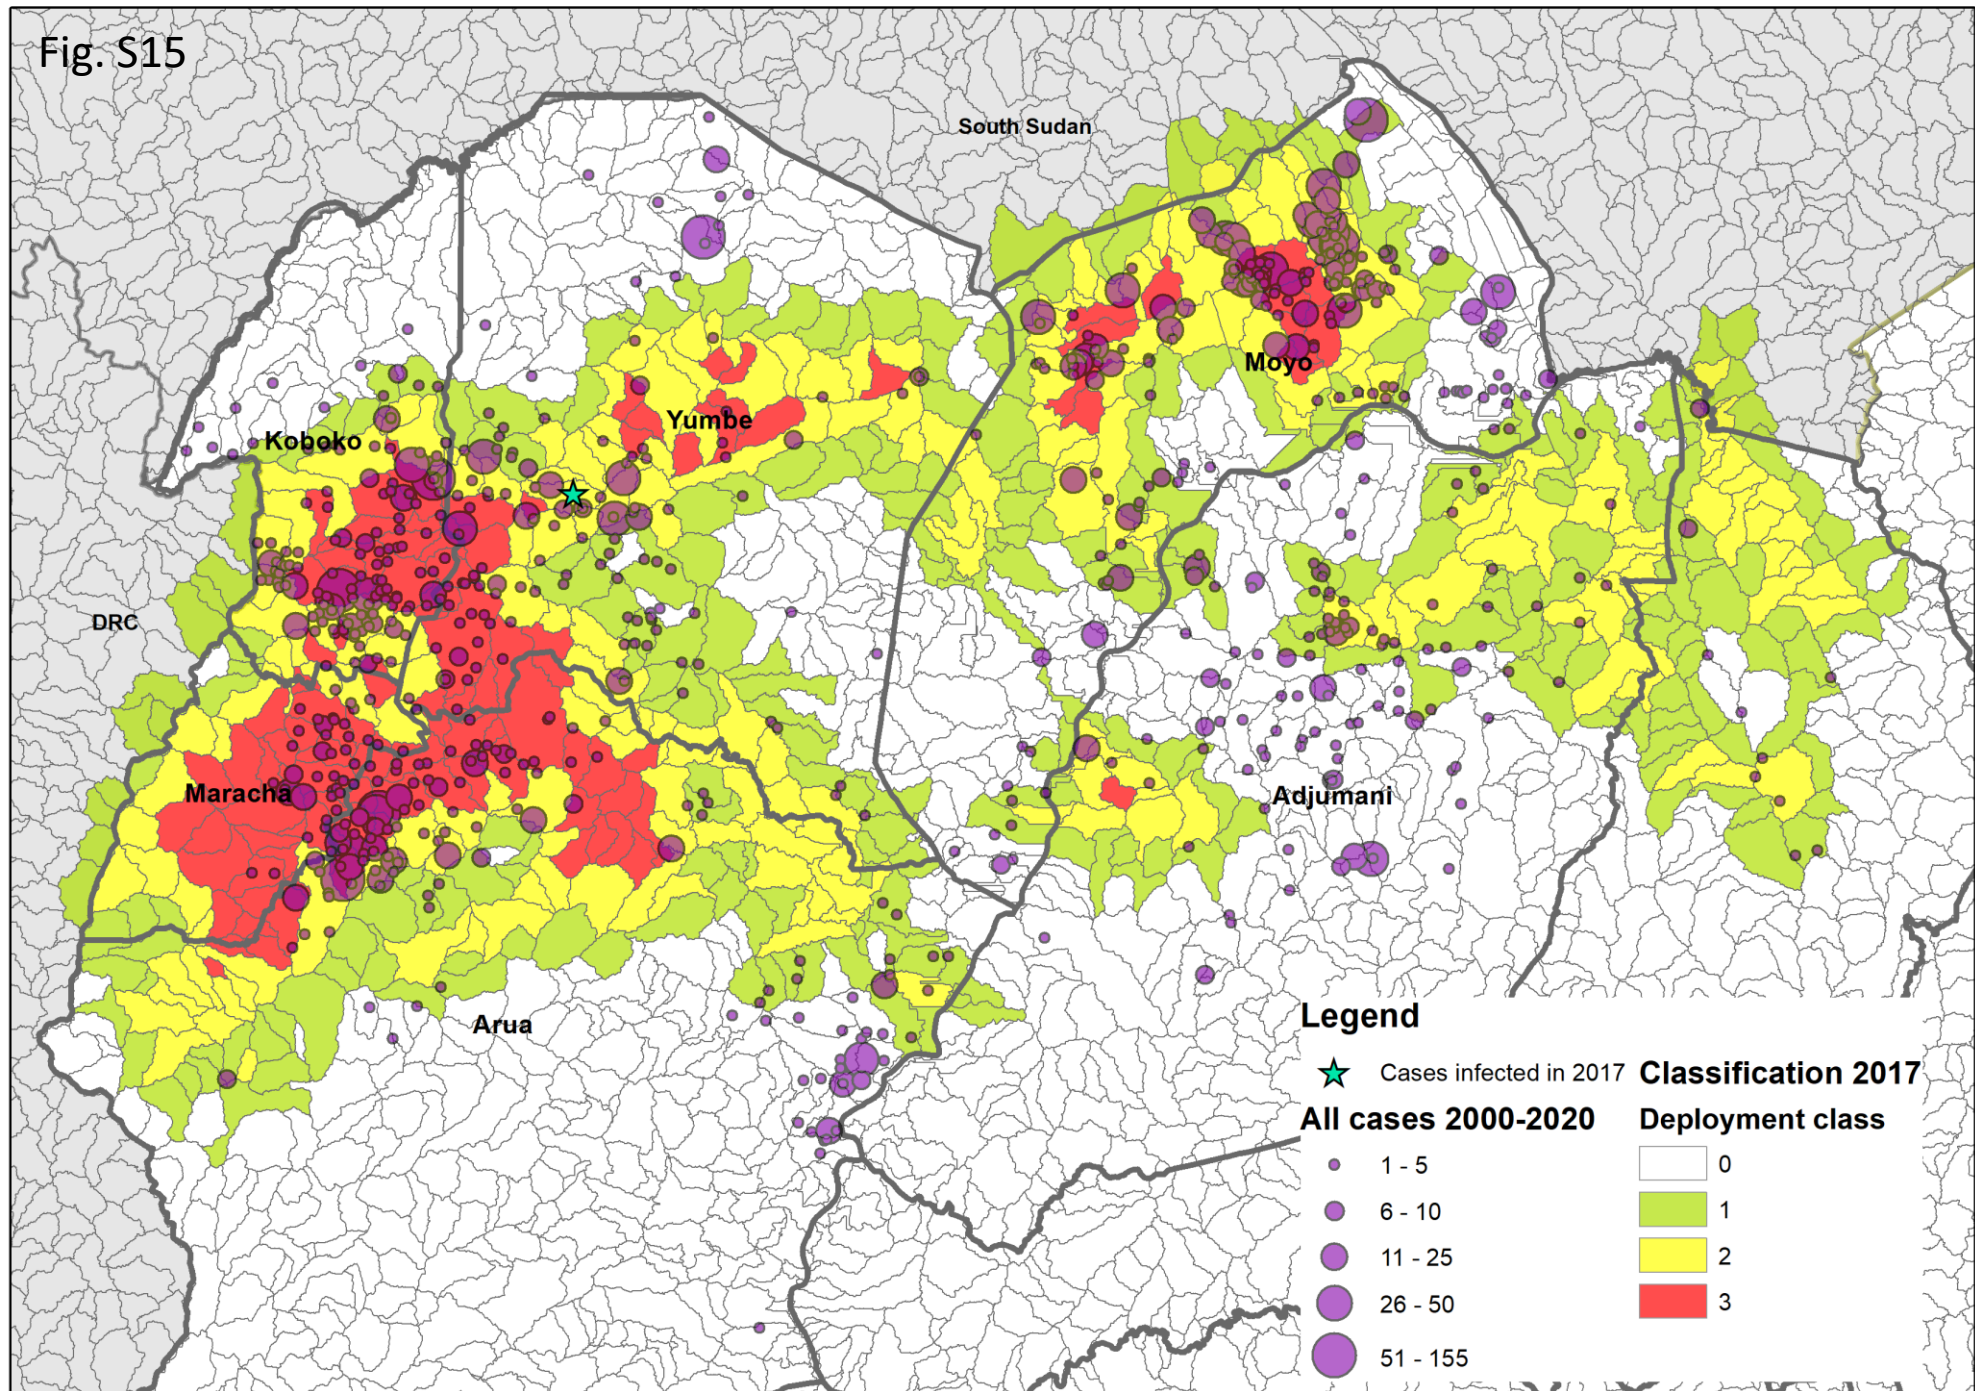



Fig. S16

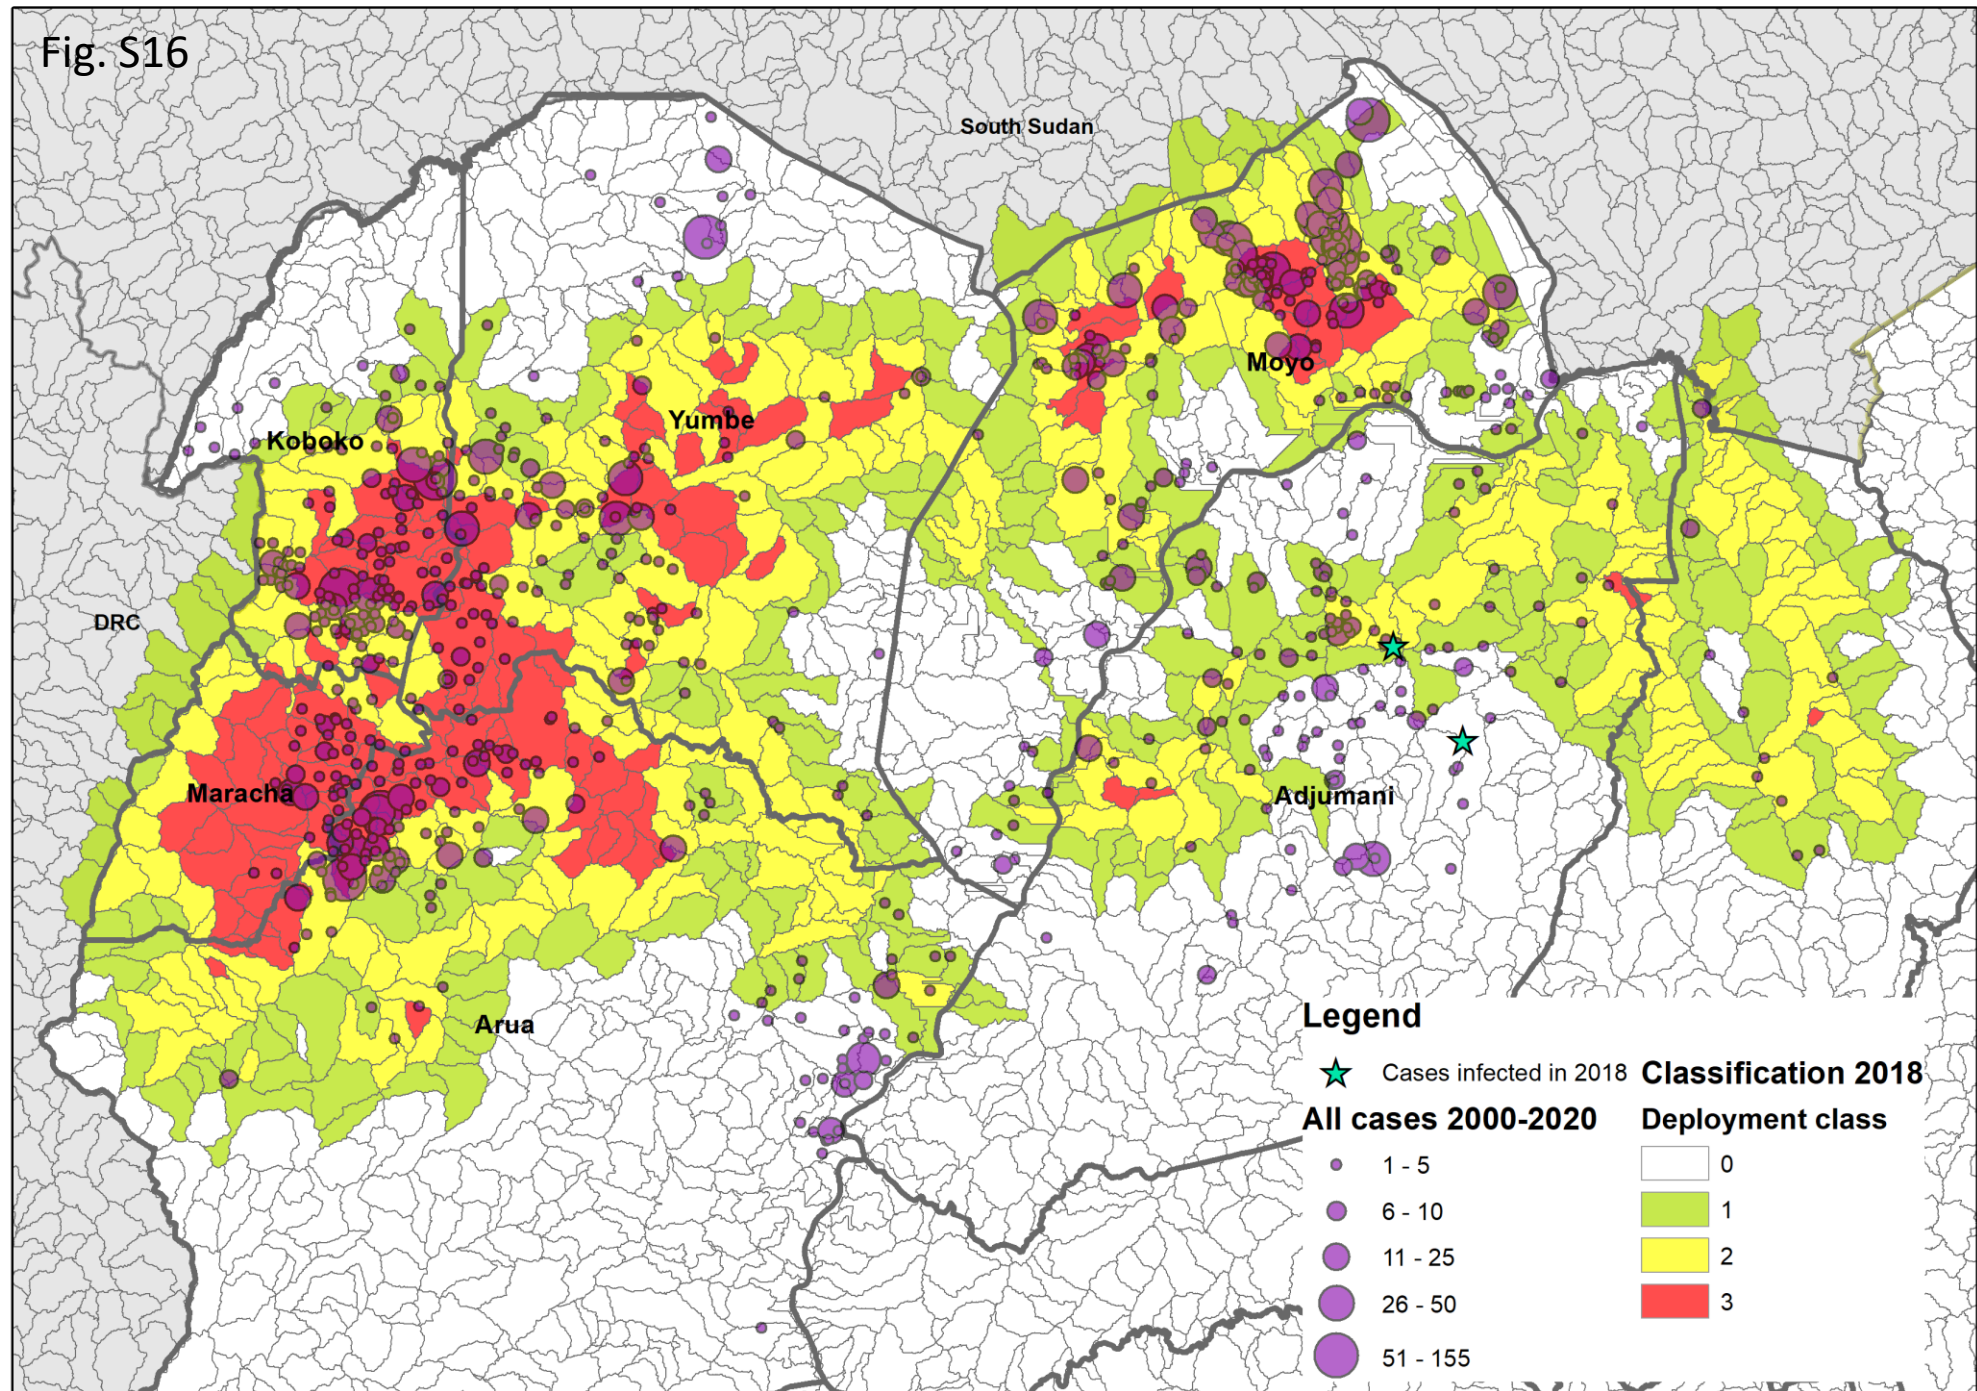



Fig. S17

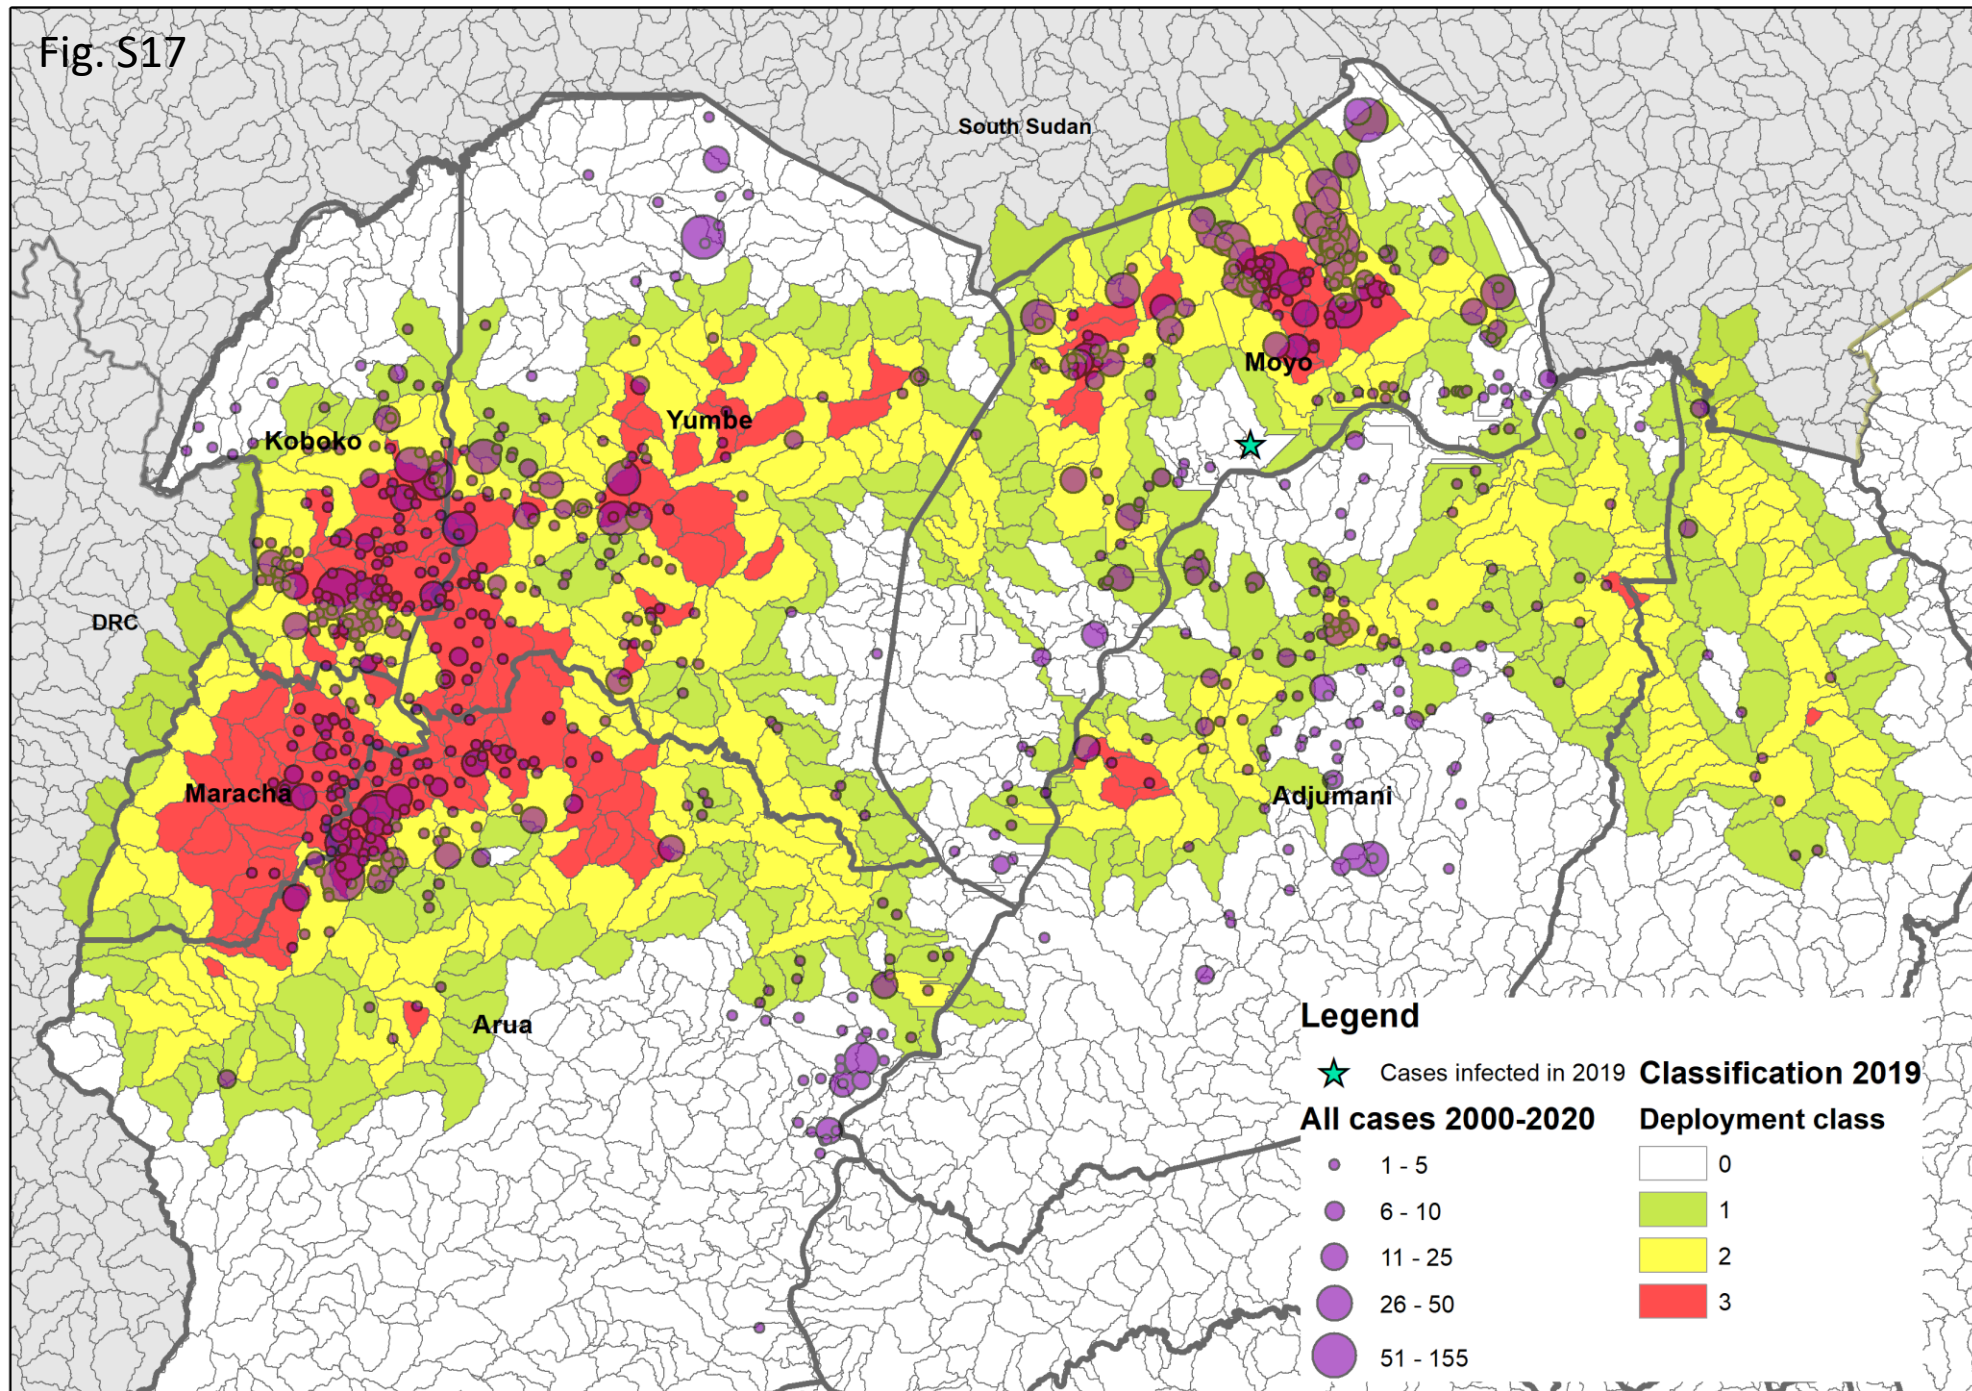

Supplement: 13071_2021_4889_MOESM2_ESM.pdf [file 13071_2021_4889_MOESM2_ESM.pdf]
